# Supplementary material
Source: PubMed Central journal article supplement (PMC2900687)
Supplement: 1006074107_sapp.pdf [file 1006074107_sapp.pdf]

## Supporting Information for

### Conservation of Progesterone Hormone Function in Invertebrate Reproduction

E. Paige Stout<sup>a</sup>, James J. La Clair<sup>c</sup>, Terry W. Snell<sup>b</sup>, Tonya L. Shearer<sup>b</sup>, & Julia Kubanek<sup>a,b</sup>

*<sup>a</sup>School of Chemistry and Biochemistry and <sup>b</sup>School of Biology, Georgia Institute of Technology, Atlanta, GA, 30332, USA*

*<sup>c</sup>Xenobe Research Institute, 3371 Adams Avenue, San Diego, California, 92116, USA*

Corresponding author: [julia.kubanek@biology.gatech.edu](mailto:julia.kubanek@biology.gatech.edu)

#### Contents:

- I. Supporting schemes and figures
- II. Supporting Western blot methods
- III. Synthetic procedures and compound characterization data

## I. Supporting schemes and figures

### Supporting schemes

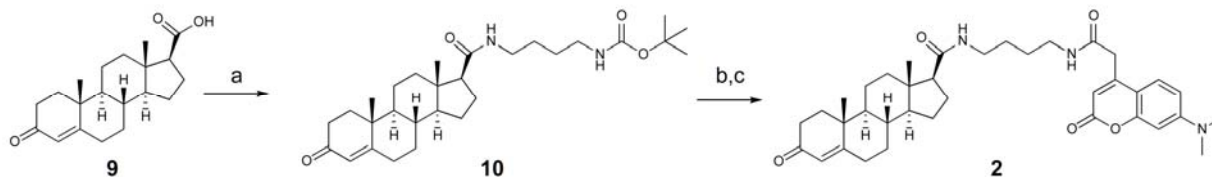

**Scheme S1.** Synthesis of IAF labeled progesterone probe **2**. Reagents and conditions: **a)** *N*-Boc-1,4-butanediylamine, HATU, DMF, 89%; **b)** TFA, CH<sub>2</sub>Cl<sub>2</sub>, rt; **c)** 7-dimethylamino-4-coumarinacetic acid, Et<sub>3</sub>N, HATU, DMF, 67% over two steps.

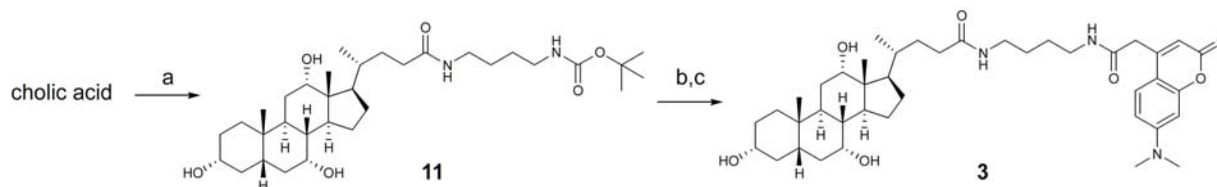

**Scheme S2.** Synthesis of IAF labeled control probe **3**. Reagents and conditions: **a)** *N*-Boc-1,4-butanediylamine, Et<sub>3</sub>N, HATU, DMF, 80%; **b)** TFA, CH<sub>2</sub>Cl<sub>2</sub>, rt; **c)** 7-dimethylamino-4-coumarinacetic acid, Et<sub>3</sub>N, HATU, DMF, 52% over two steps.

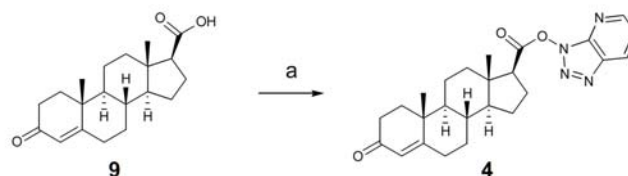

**Scheme S3.** Synthesis of reactive ester **4**. Reagents and conditions: **a)** HATU, DMF, 94%.

## Supporting figures

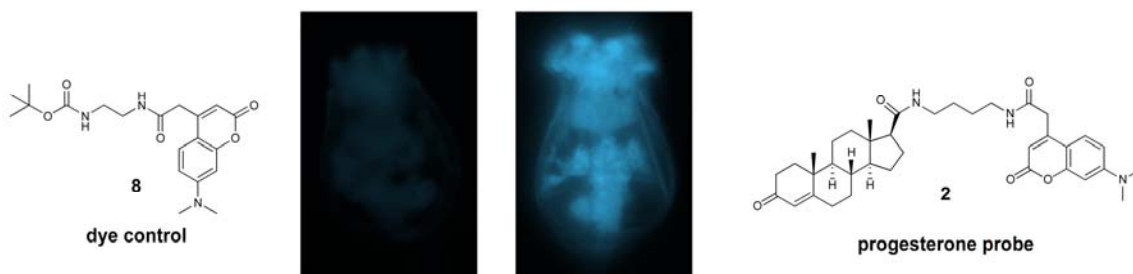

**Figure S1.** *Brachionus manjavacas* hatchlings incubated with the IAF-labeled progesterone probe **2** (right) and a fluorescent control **8** (left) at 10  $\mu\text{g/mL}$ . Uptake of **8** was not detected under the conditions used to image hatchlings incubated with **2**.

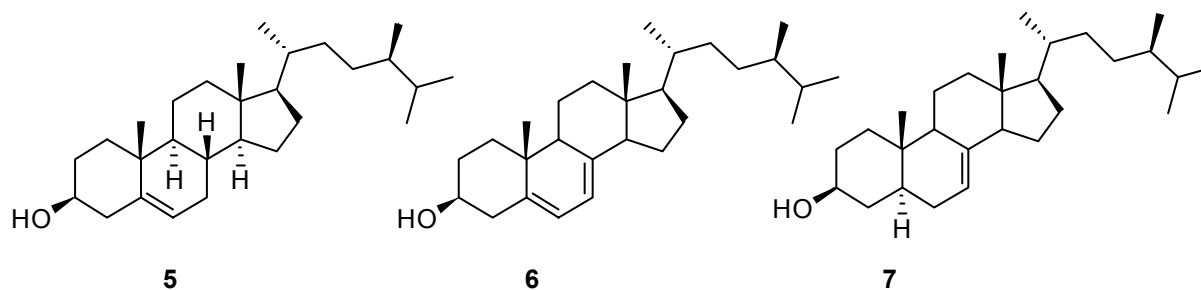

**Figure S2.** Steroids isolated from *Brachionus manjavacas* including campesterol (24*R*-ergost-5-en-3 $\beta$ -ol, **5**), campesta-5,7-dien-3 $\beta$ -ol (**6**), and 5 $\alpha$ -campest-7-en-3 $\beta$ -ol (**7**). Authentic standards of **5** and **7** were purchased from Sigma-Aldrich for verification of structures. Campesterol (Sigma-Aldrich product number C5157) was purchased as a 65:35 mixture of crystalline 24*R*-ergost-5-en-3 $\beta$ -ol and 24*S*-ergost-5-en-3 $\beta$ -ol, distinguishable via  $^{13}\text{C}$  NMR spectroscopy. Carbon-13 NMR spectral data was acquired for both the authentic standard and the isolated rotifer steroid.  $^{13}\text{C}$  NMR spectral data for the isolated rotifer steroid **5** were identical to 24*R*-ergost-5-en-3 $\beta$ -ol  $^{13}\text{C}$  NMR chemical shifts, consistent with the hypothesis that **5-7** were of dietary (algal) origin. Sterol **6** was identified by comparing spectrometric data to reported literature values.

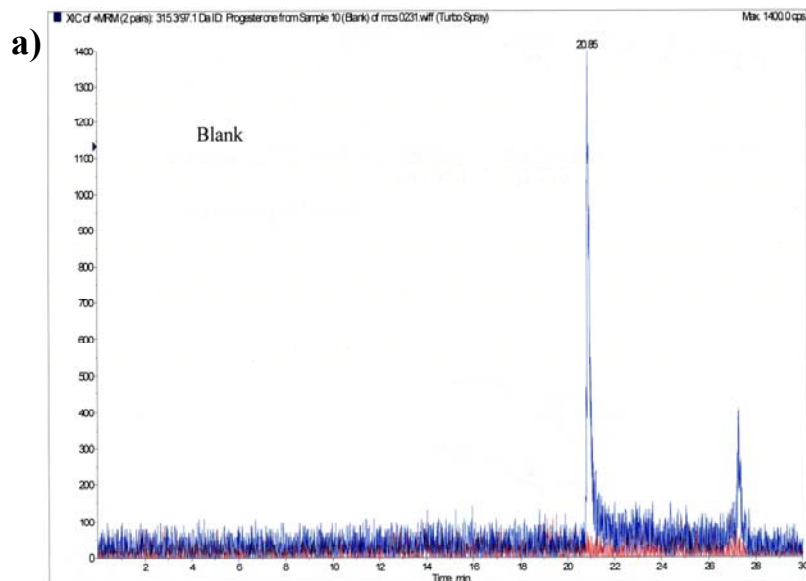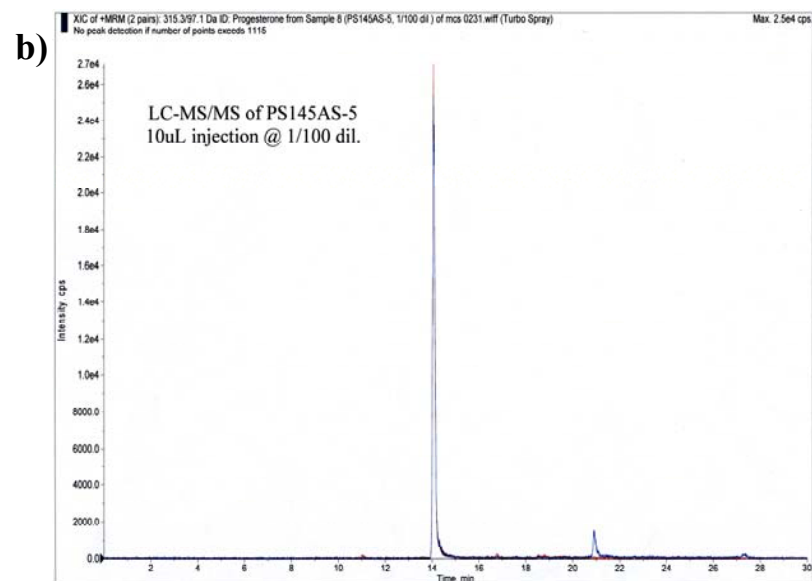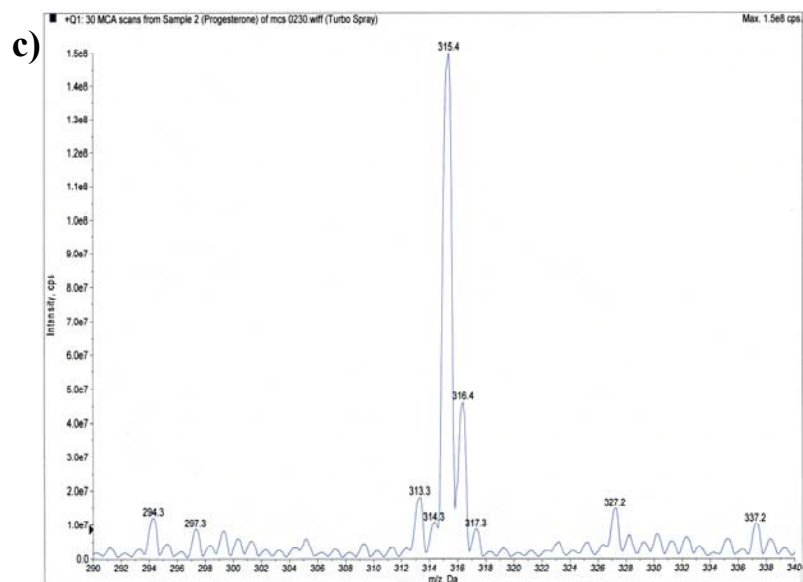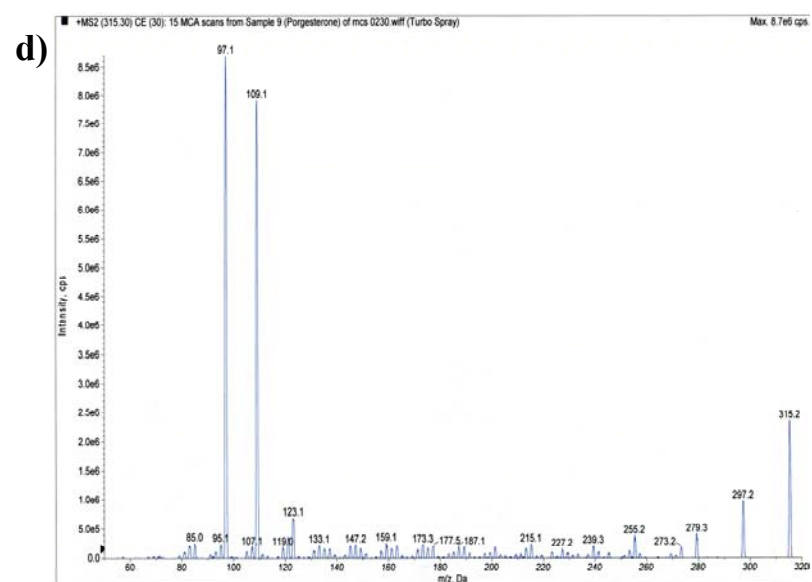

**Figure S3.** LC-MS/MS data operating in multiple reaction monitoring mode for analysis of progesterone in a partially purified rotifer steroid-containing fraction; **a)** blank injection prior to sample analysis; **b)** LC chromatogram of rotifer steroid sample, where progesterone elutes at 14 min.; **c)** mass spectrum of LC peak at 14 min corresponding to progesterone  $[M+H]^+$   $m/z$  315.4; **d)** MS/MS daughter ions of  $m/z$  109.1 and 97.1, corresponding to known progesterone fragmentation.

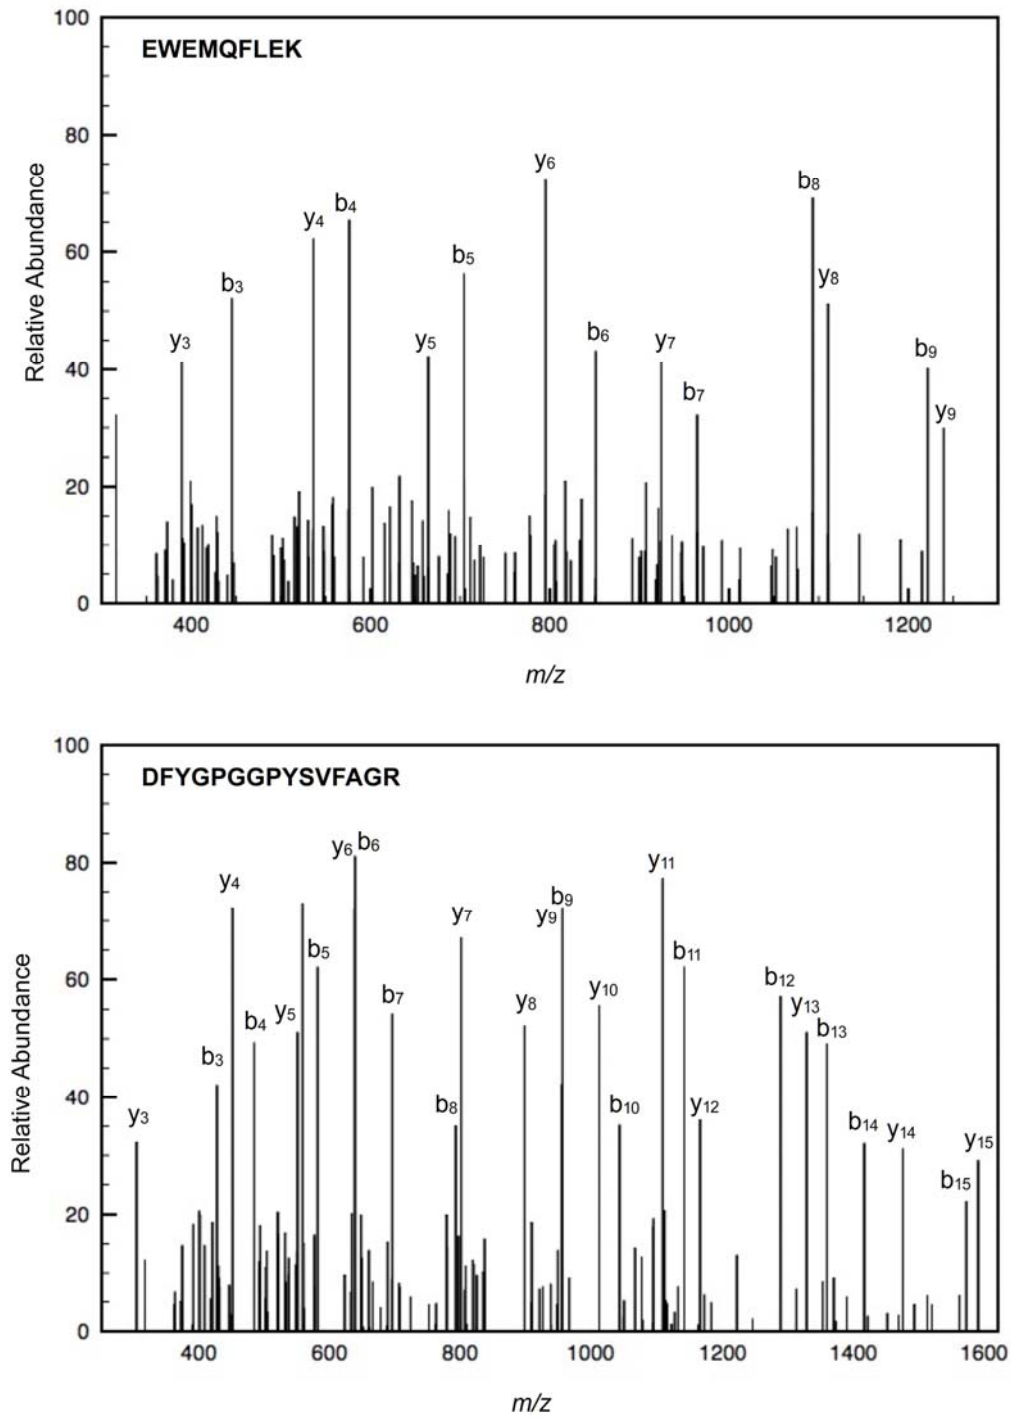

**Figure S4.** MS/MS detection of peptides: (top) daughter ions of  $m/z$  1239.57 corresponding to EWEMQFLEK and (bottom) daughter ions of  $m/z$  1589.74 corresponding to DFYGPGGPYSVFAGR.

|     |     |                  |     |     |     |                       |     |
|-----|-----|------------------|-----|-----|-----|-----------------------|-----|
| P1: | 1   | <b>EWEMQFLEK</b> | 9   | P2: | 2   | <b>FYGPGGPYSVFAGR</b> | 15  |
| A1: | 160 | <b>EWEMQFMEK</b> | 168 | A2: | 103 | <b>FYGPGGPYSAFAGR</b> | 116 |
| B1: | 137 | <b>EWEMQFMEK</b> | 145 | B2: | 64  | <b>FYGPGGPYEVFAGR</b> | 77  |
| C1: | 163 | <b>EWEMQFMEK</b> | 171 | C2: | 91  | <b>FYGPGGPYSNFAGR</b> | 105 |

**Figure S5.** Blast searches on the respective peptides EWEMQFLEK (P1) and DFYGPGGPYSVFAGR (P2). Peptide A1 is found in the progesterin membrane receptor component 2 from *Oncorhynchus mykiss* (gb|ABD58973.1|, 88% identities); B1 is found in the progesterone receptor membrane component 1 from *Strongylocentrotus purpuratus* (ref|XP\_783332.1|, 88% identities); and C1 is found in the progesterone receptor membrane component 2 from *Danio rerio* (gb|AAH53415.1|, 88% identities). Peptide A2 is found in the progesterin membrane receptor component 1 from *Panaeus monodon* (gb|ACC62174.1|, 92% identities); B2 is found in the steroid binding protein 1 from *Thalassiosira pseudonana* (gb|EED96317.1|, 92% identities); and C2 is found in the hypothetical protein FG02758.1 from *Gibberella zeae* PH-1 (ref|XP\_382934.1|, 86% identities).

ATGGCC**CGACGGTTCTTTGACGATGTC**ATATCATCTCCGGTCAATATTTTTCTAGTAGGTTTGATCT  
GCTACTTCTCGTACAAATTGATCAAAAAAGATAGCACCAAATCGCCGGCGAGAAAAAACTCAA  
AATCAGAAAATGATTTGGCTAAAATGCCAAAACAAGATTTTACTTTGGAAGAGCTAAAGCAATATGACG  
GGATTAAATCCGATGGACGATTTTAAATGGGGTACTTGGCAAAGTTTTGATGTTTCAAAGCGAA  
AGATTTCTATGGACCGGGCGGTCCGTATTCCGTATTTGCTGGTCGCGATGCATCCAGAGCGTTGGGC  
ACTTTTTCTGTGGACAAATCCCAATTTAAAGATGAATACGATGATCTAAGCGATCTGAAGAGTTCTC  
AGATGGAAAGTATCAAAGAATGGGAGATGCAATTTTTGGAAAAATATCCACTTGTTGGTAATTTGCT  
AAGGCCTGGTGAAGAGCCCACTGTTT**ACGAAGAAGAGTCAGCCGAA**GTAAAAAACAACCTTTAA

**Figure S6.** ORF within the rotifer progesterone gene (GenBank accession FJ829246) from the *Brachionus manjavacas* cDNA database. This is the reverse complement of the contig sequence. Bold and underlined bases indicate primer sequences; green indicates area amplified for the dsRNA used in RNAi knockdown experiments.

Figure S7a

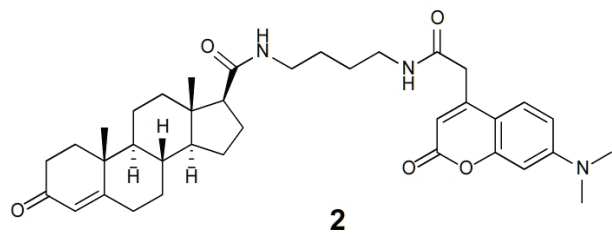

<sup>1</sup>H-NMR  
500 MHz  
acetone-d<sub>6</sub>

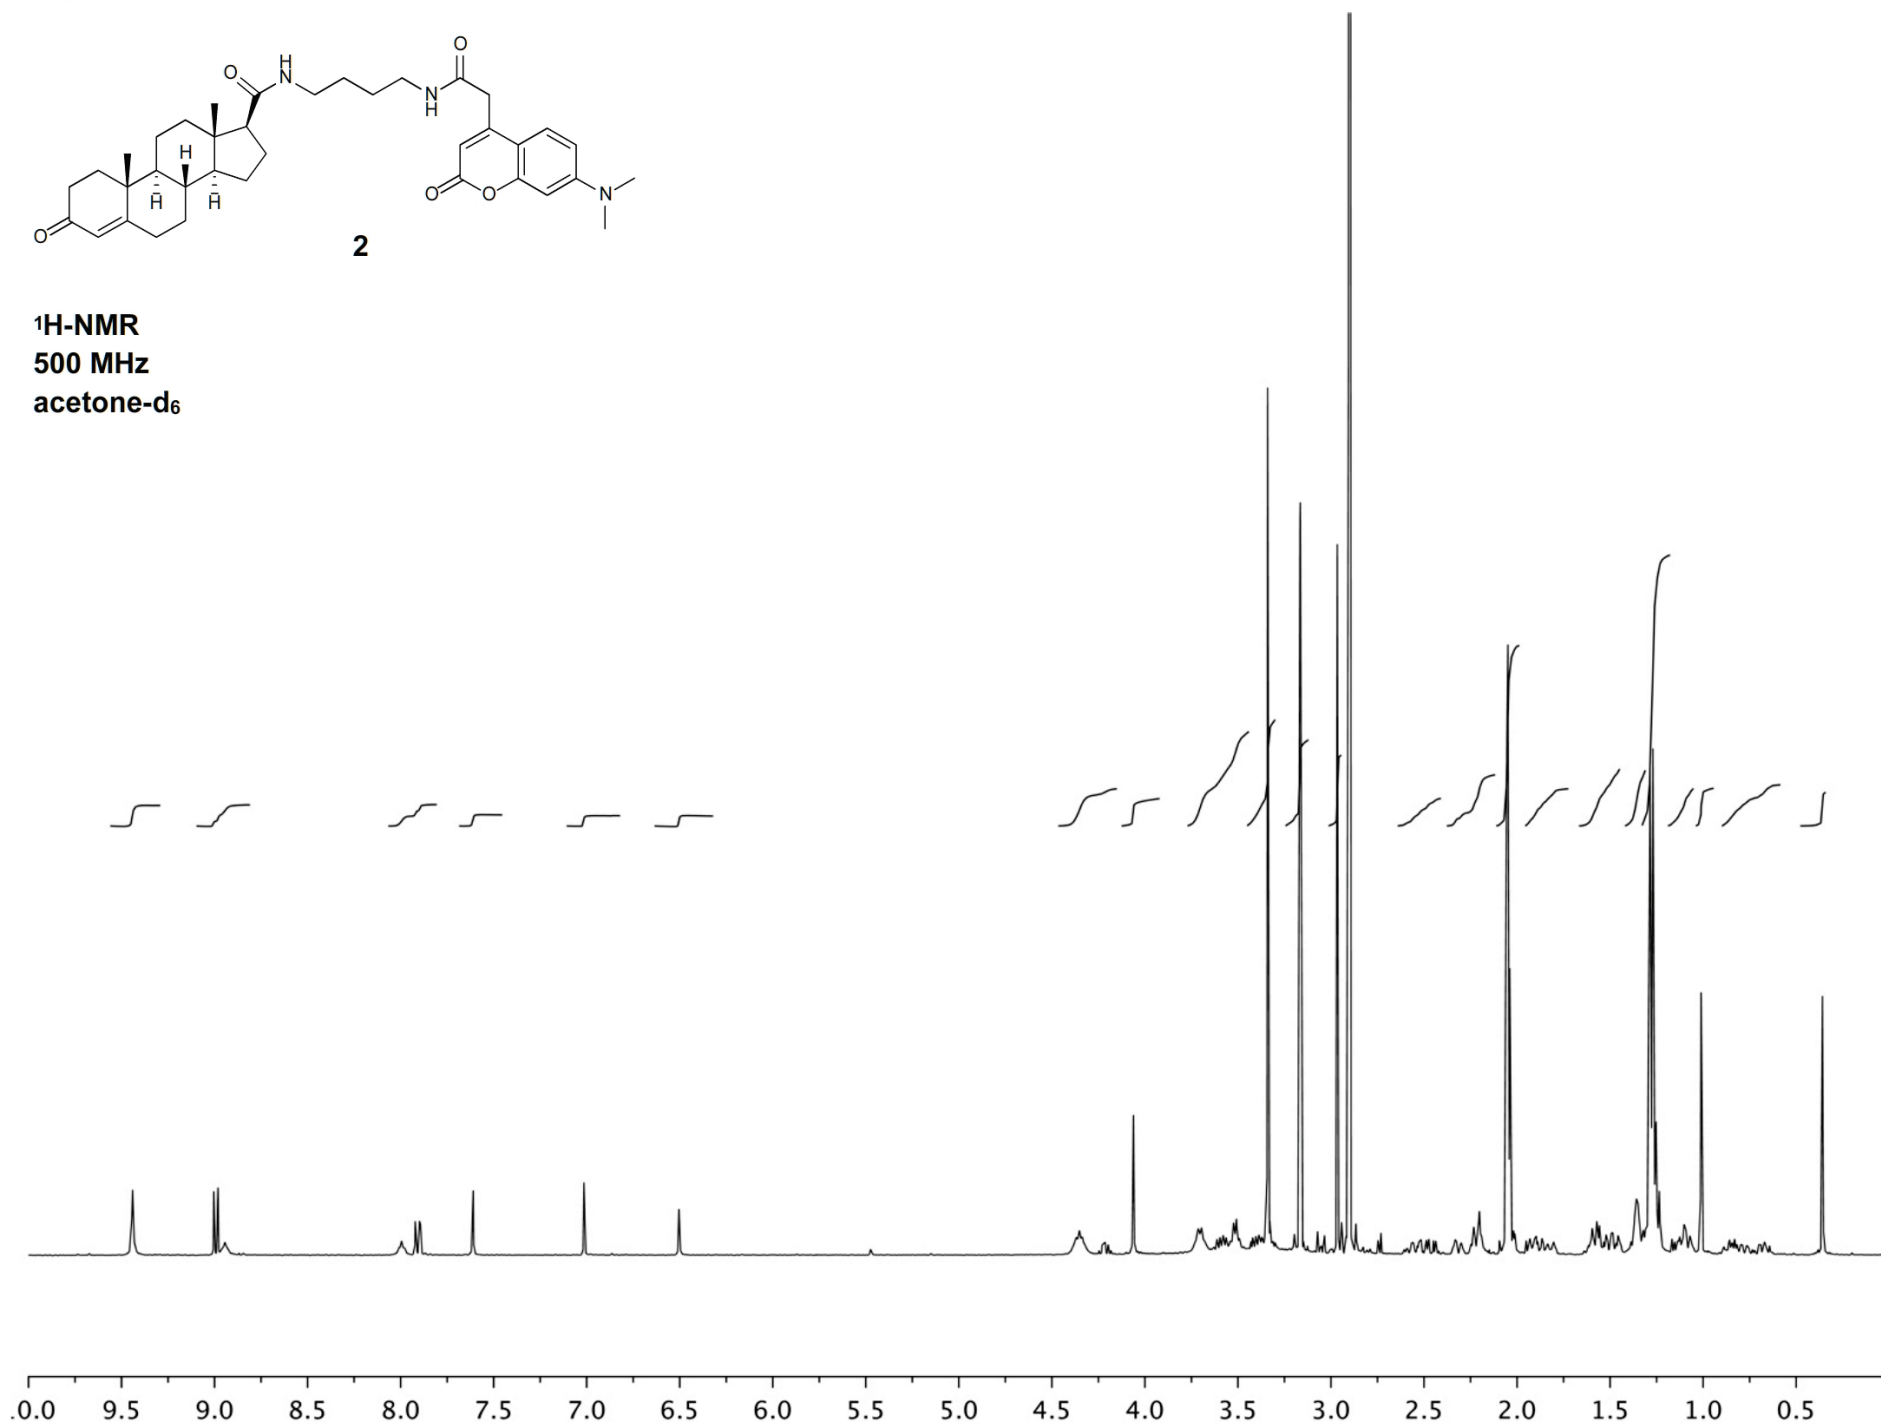

Figure S7b

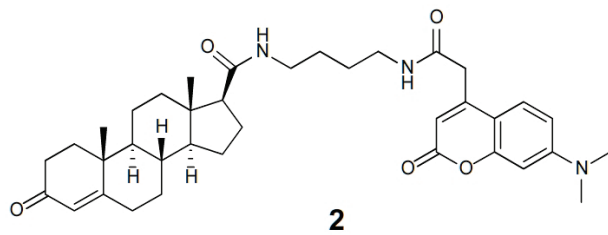

2

<sup>13</sup>C-NMR  
125 MHz  
acetone-d<sub>6</sub>

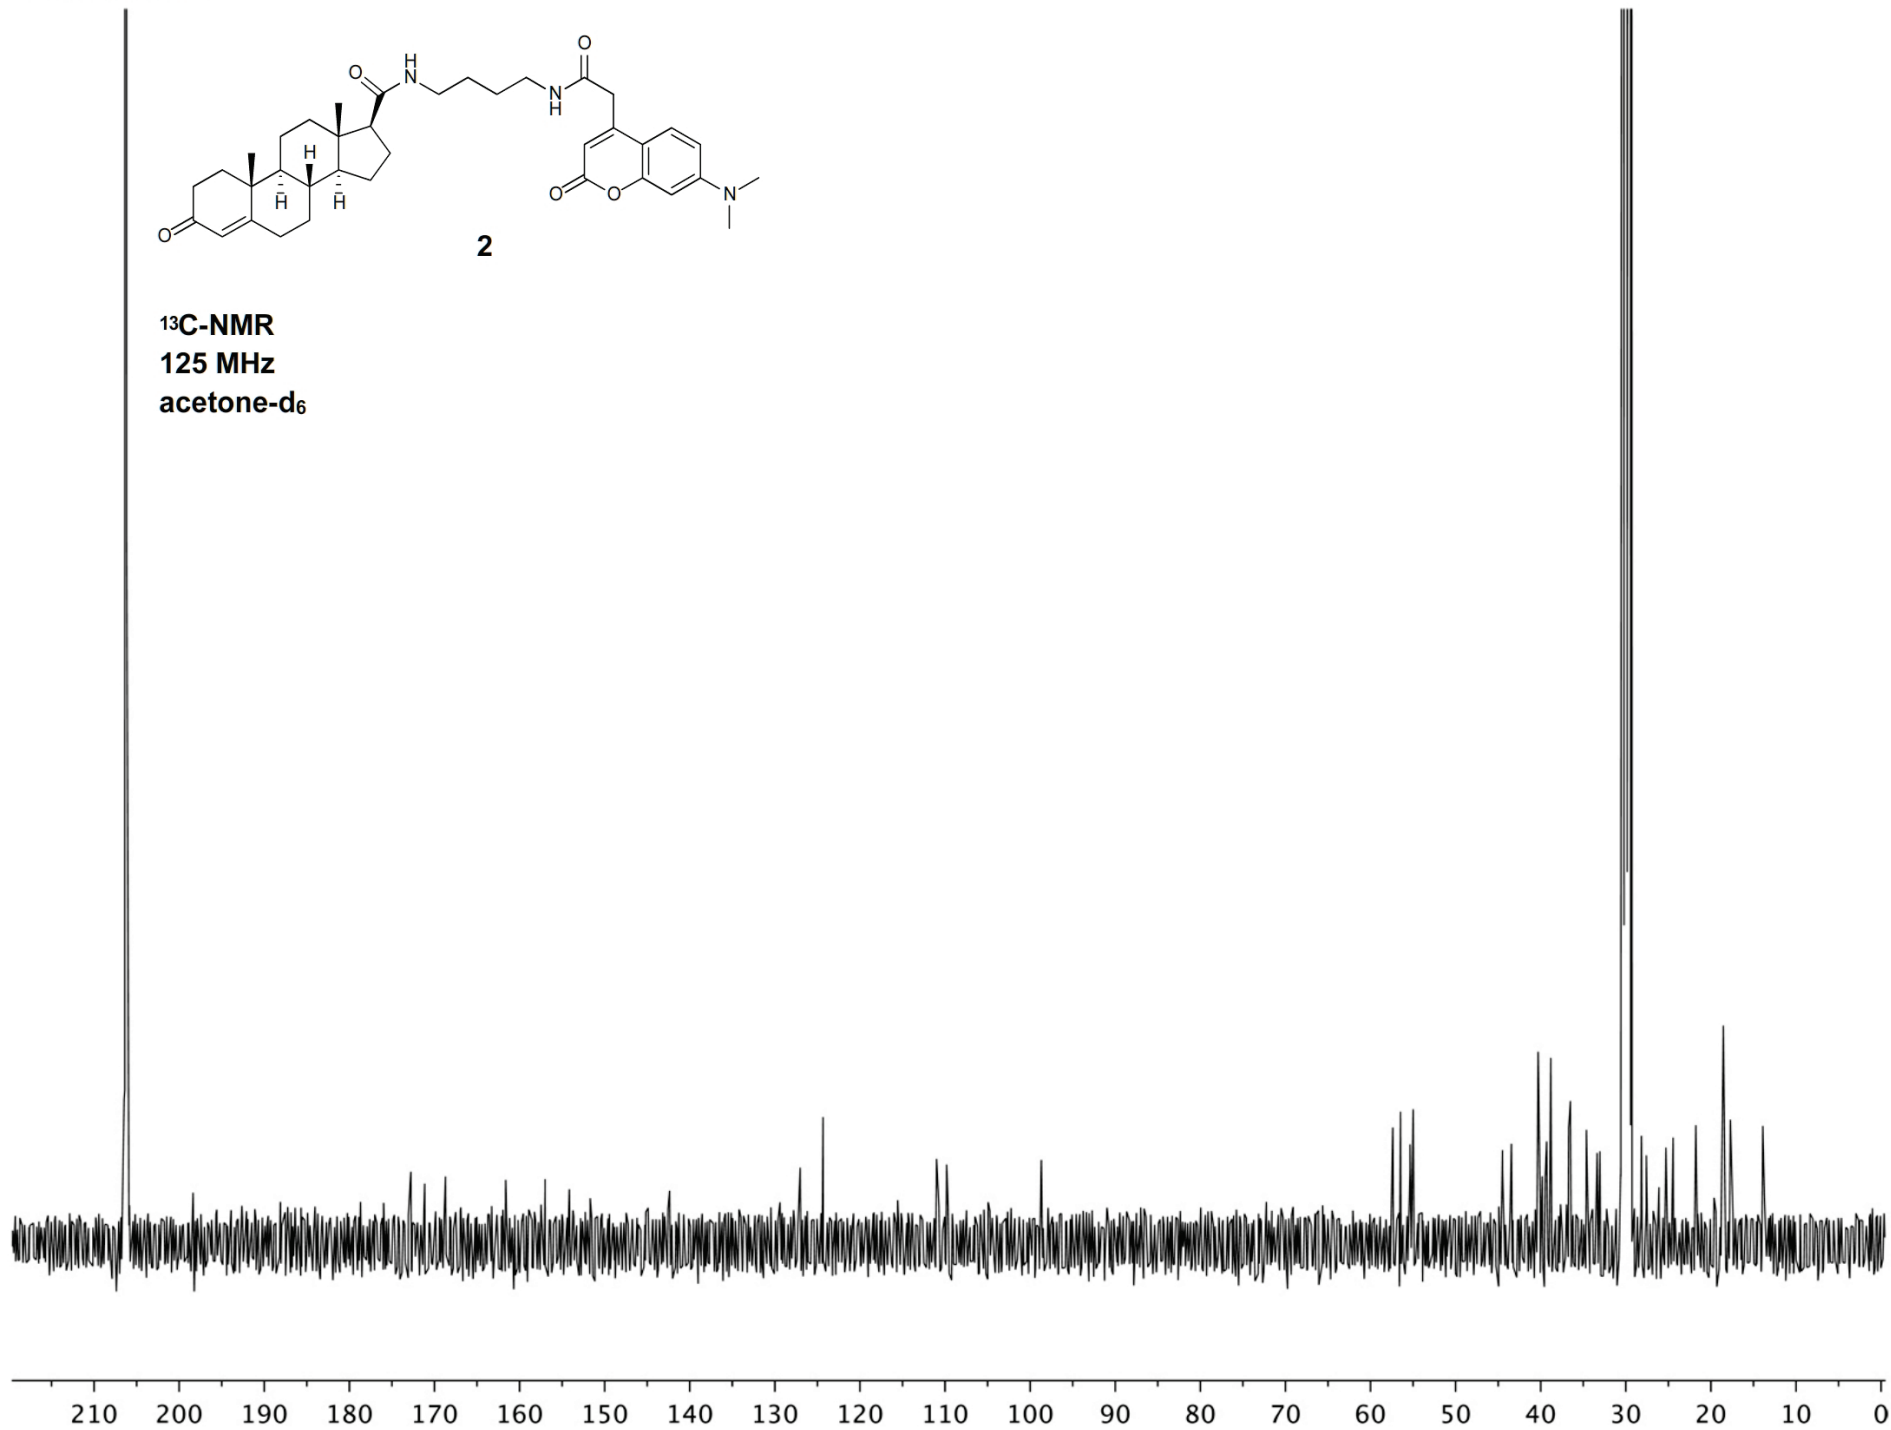



Figure S7c

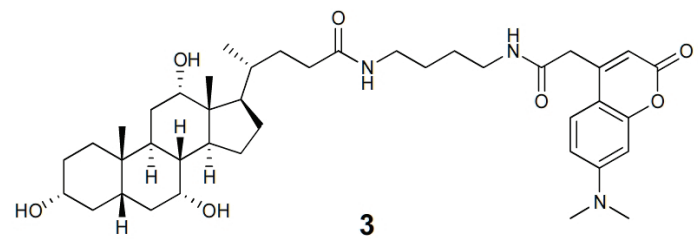

**<sup>1</sup>H-NMR**  
**500 MHz**  
**CDCl<sub>3</sub>**

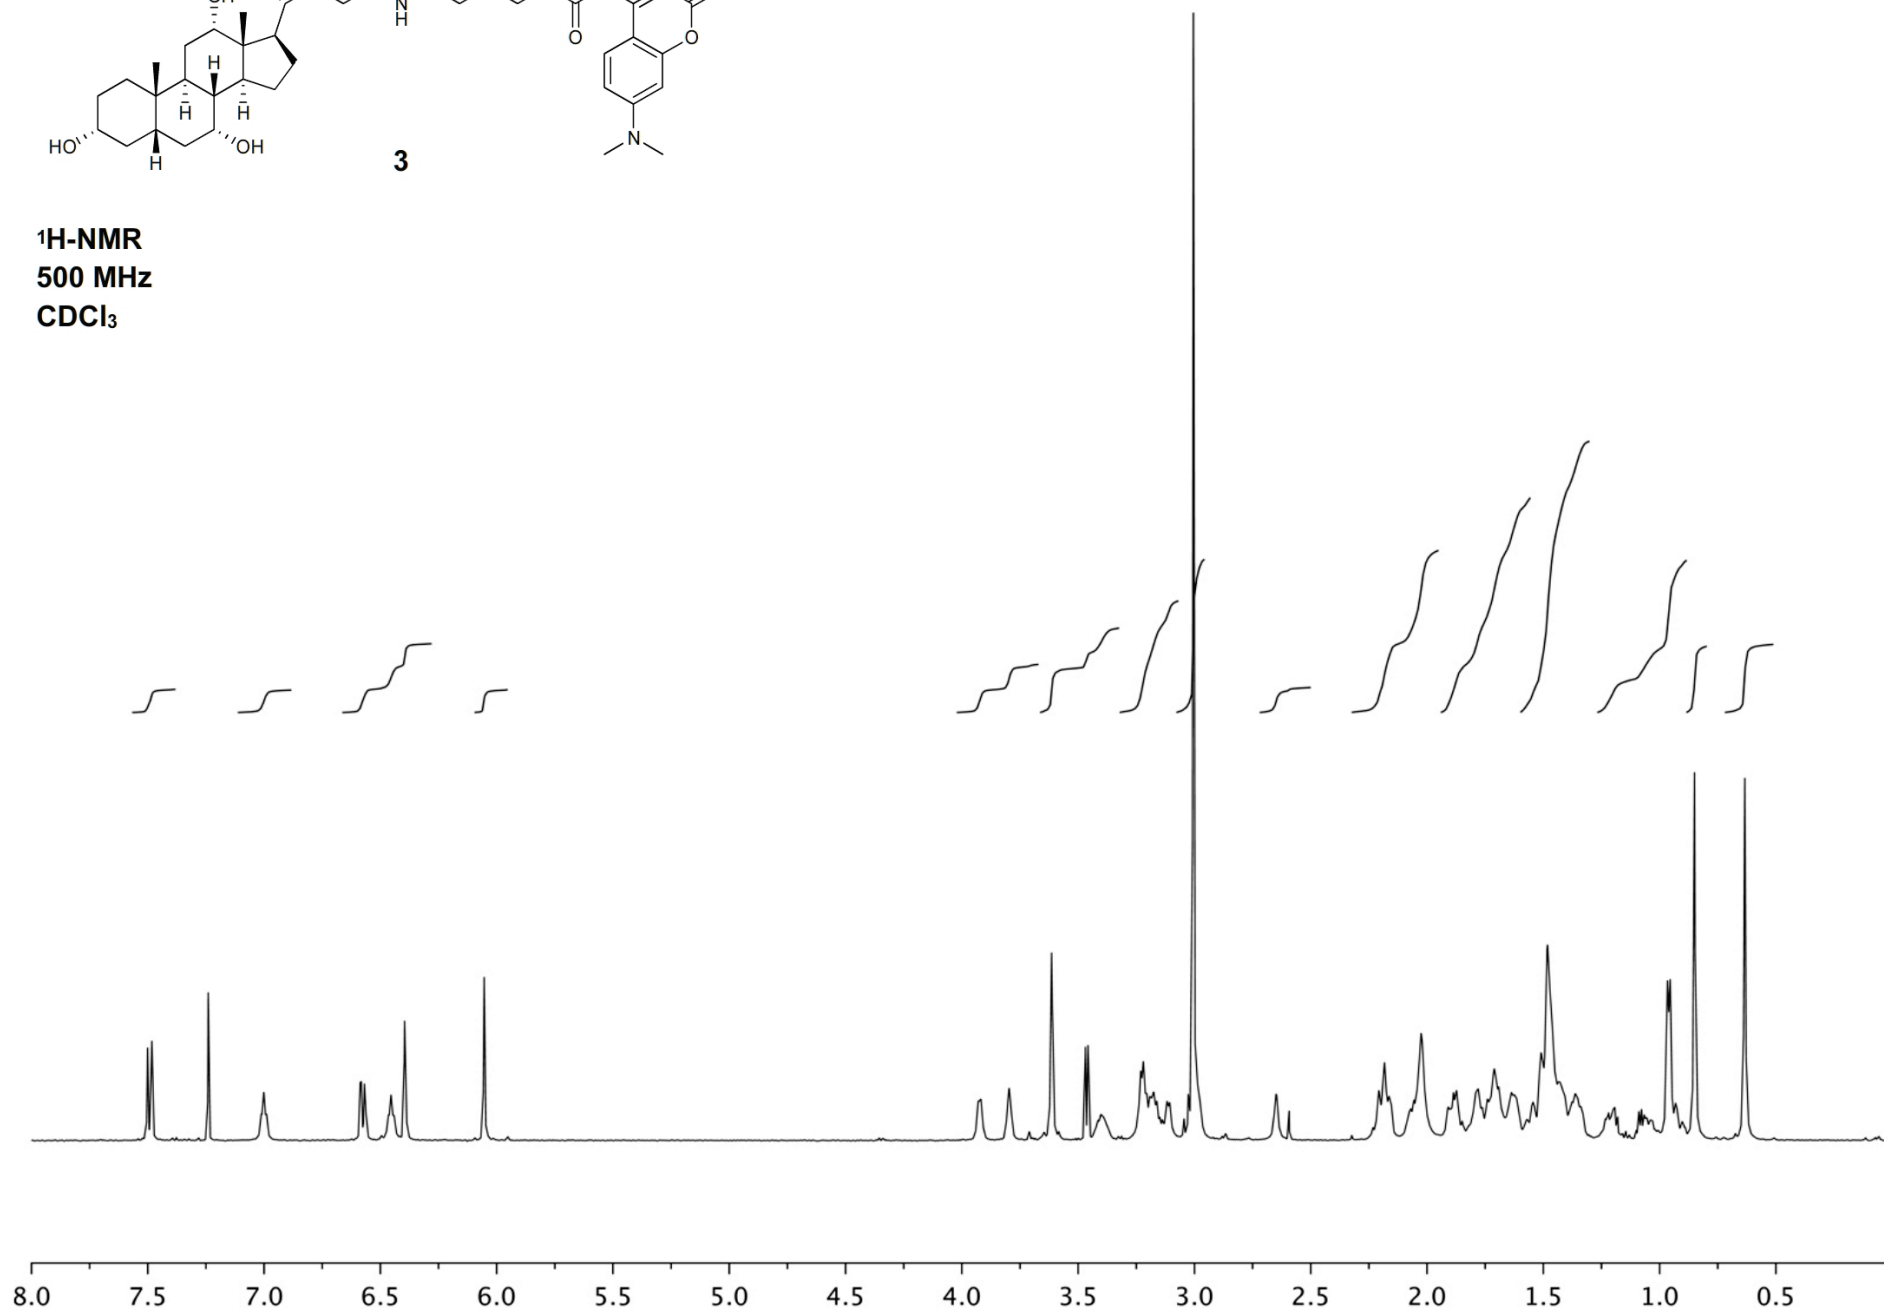

Figure S7d

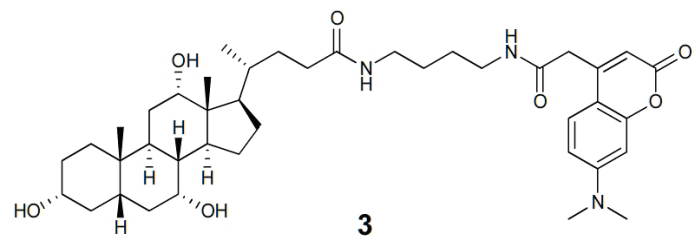

<sup>13</sup>C-NMR  
125 MHz  
CDCl<sub>3</sub>

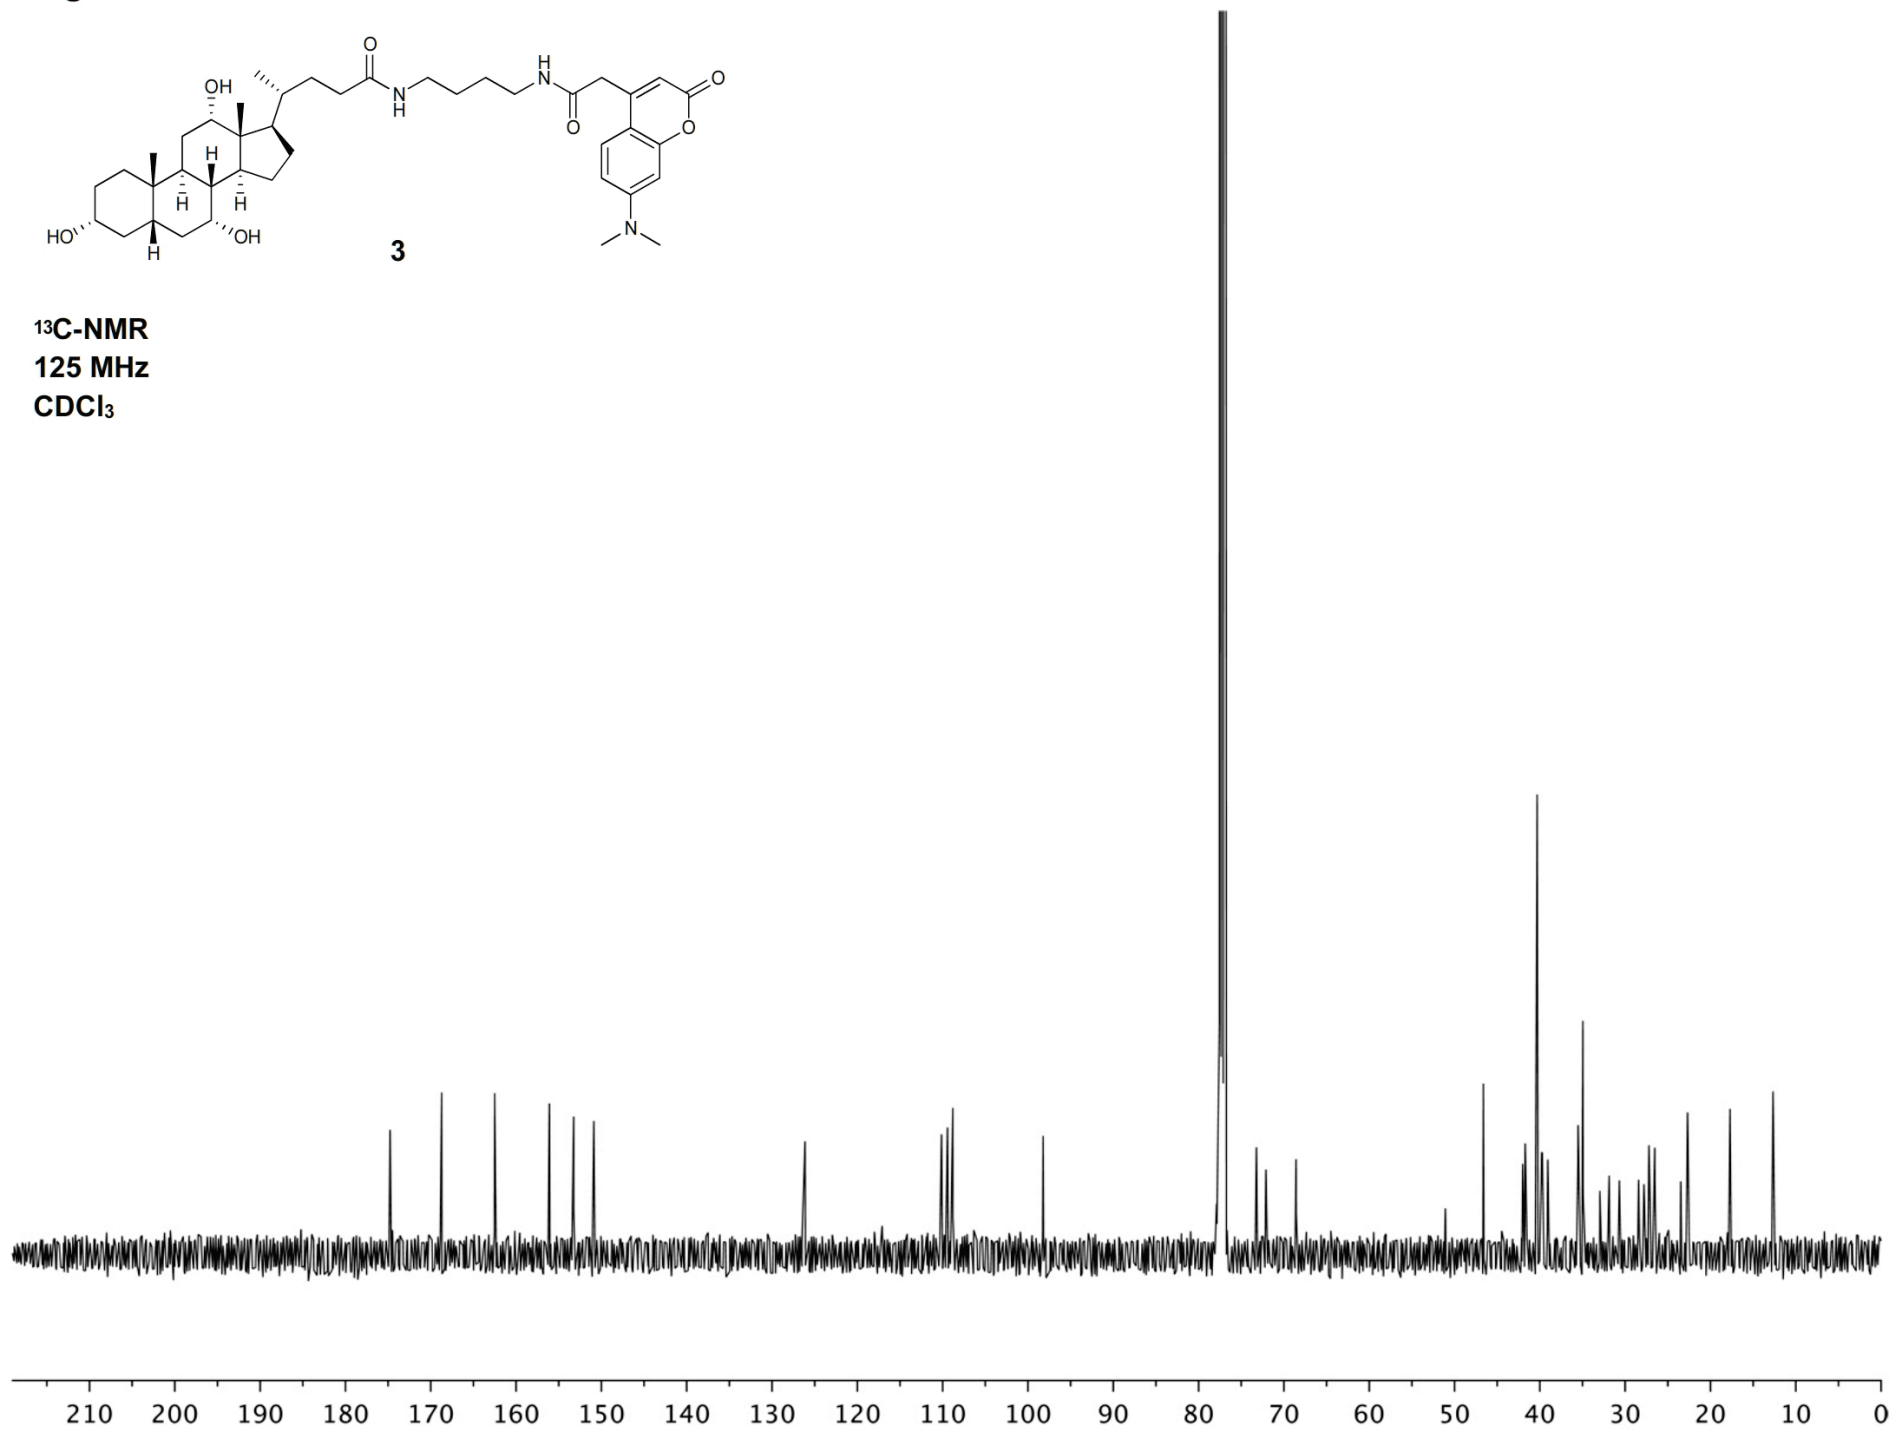

**Figure S7e**

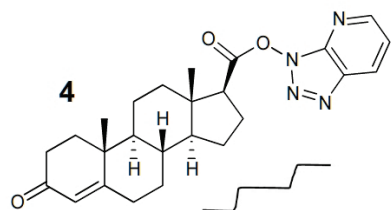

**<sup>1</sup>H-NMR**  
**500 MHz**  
**CDCl<sub>3</sub>**

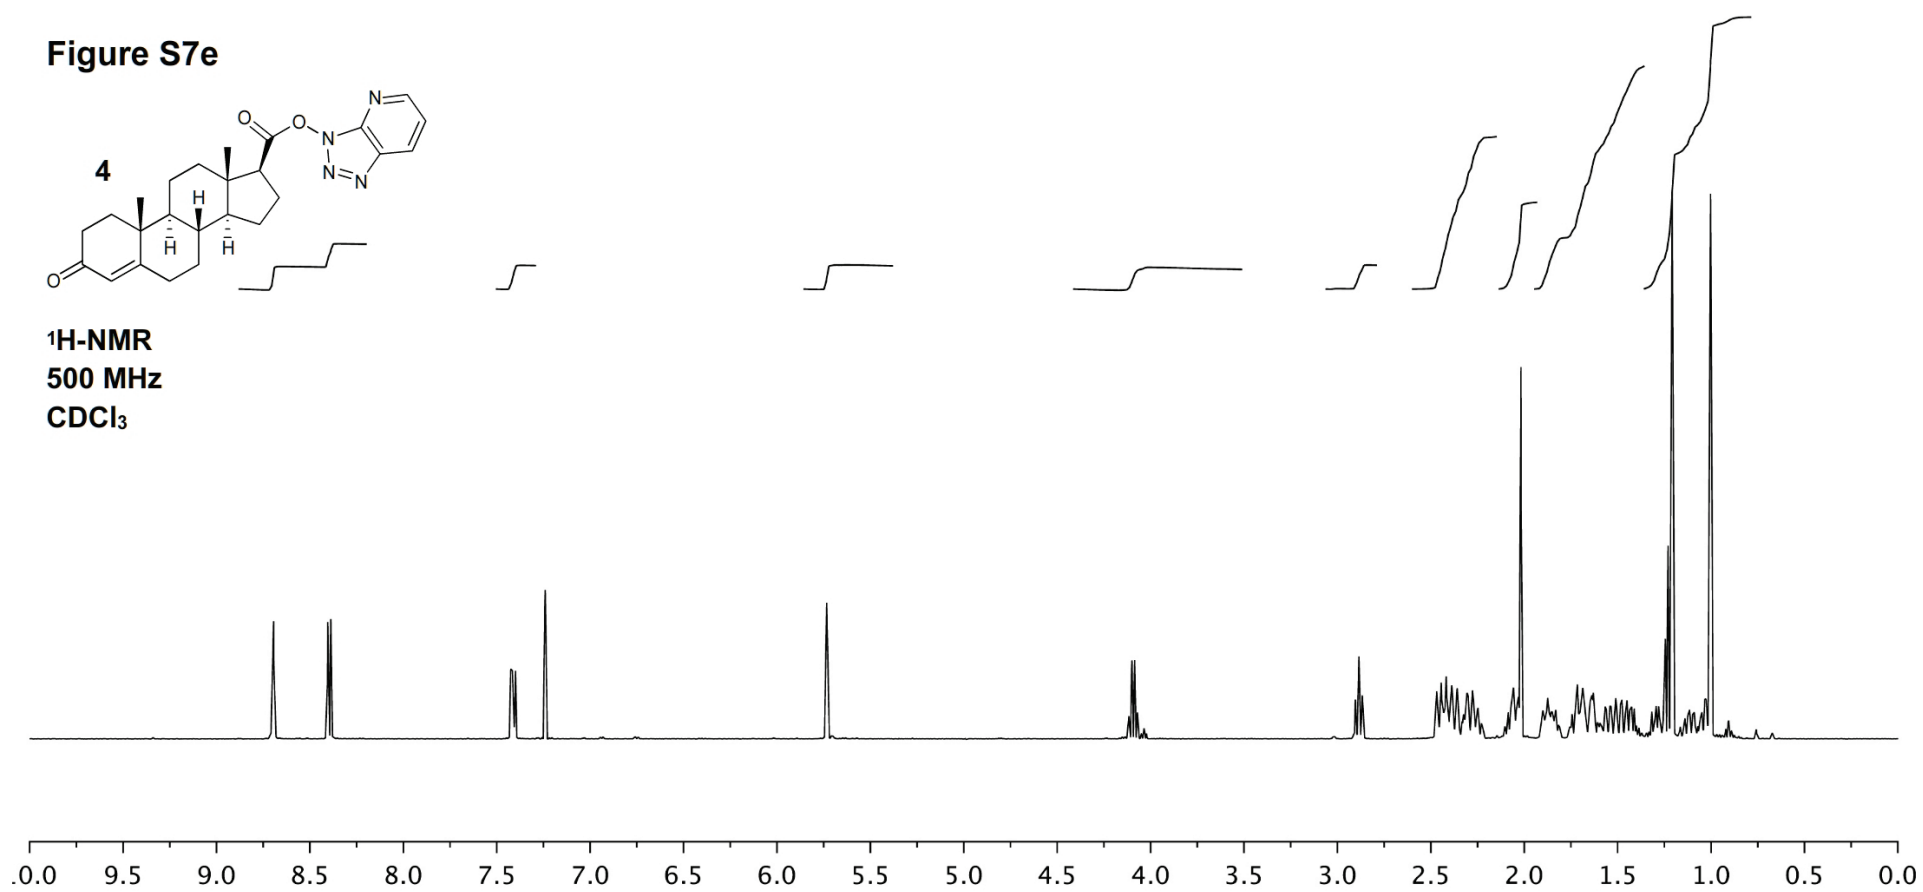

**Figure S7f**

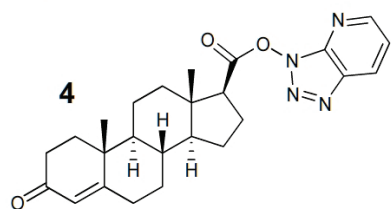

**<sup>13</sup>C-NMR**  
**100 MHz**  
**CDCl<sub>3</sub>**

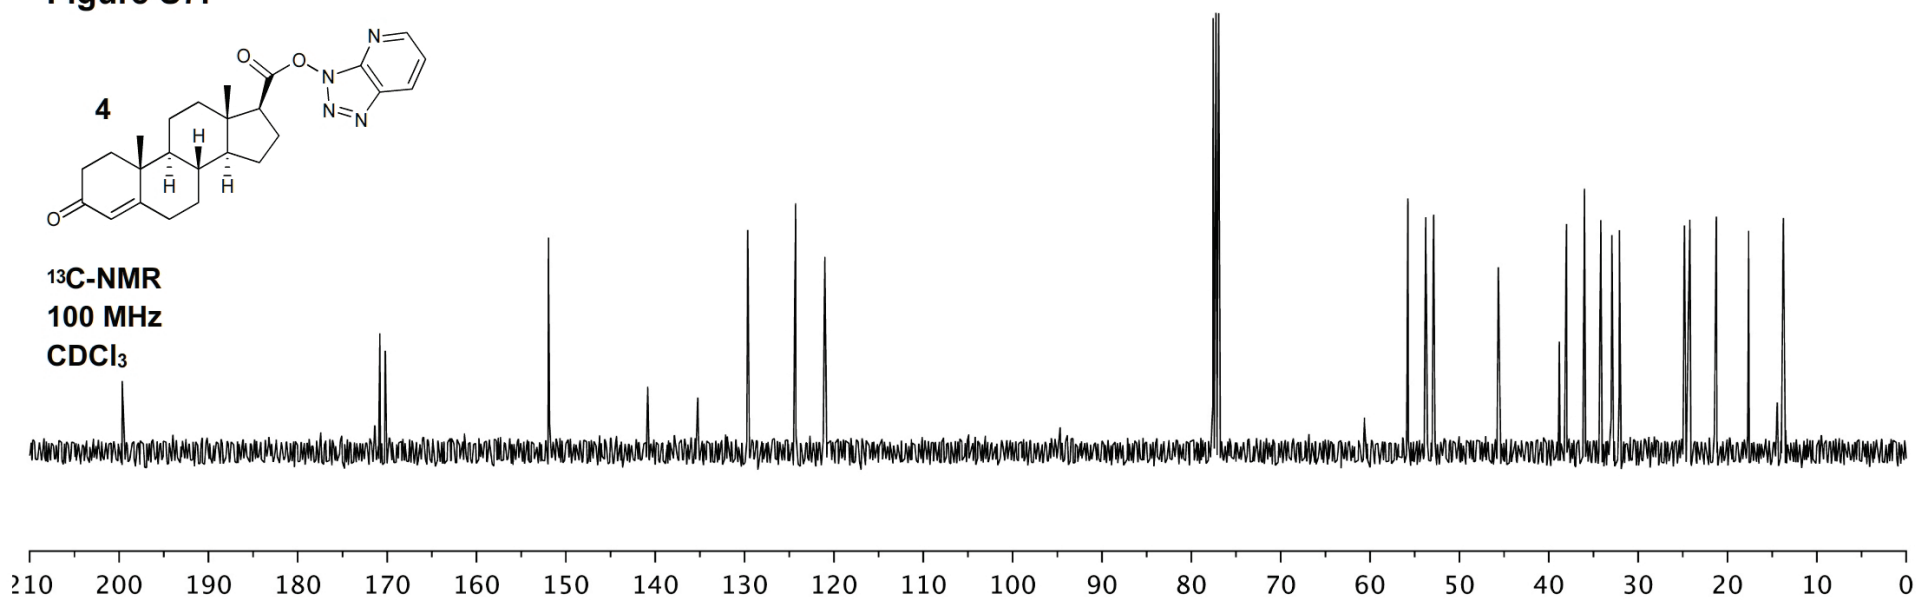

Figure S7g

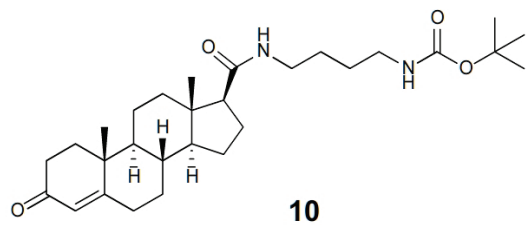

**<sup>1</sup>H-NMR**  
**500 MHz**  
**acetone-d<sub>6</sub>**

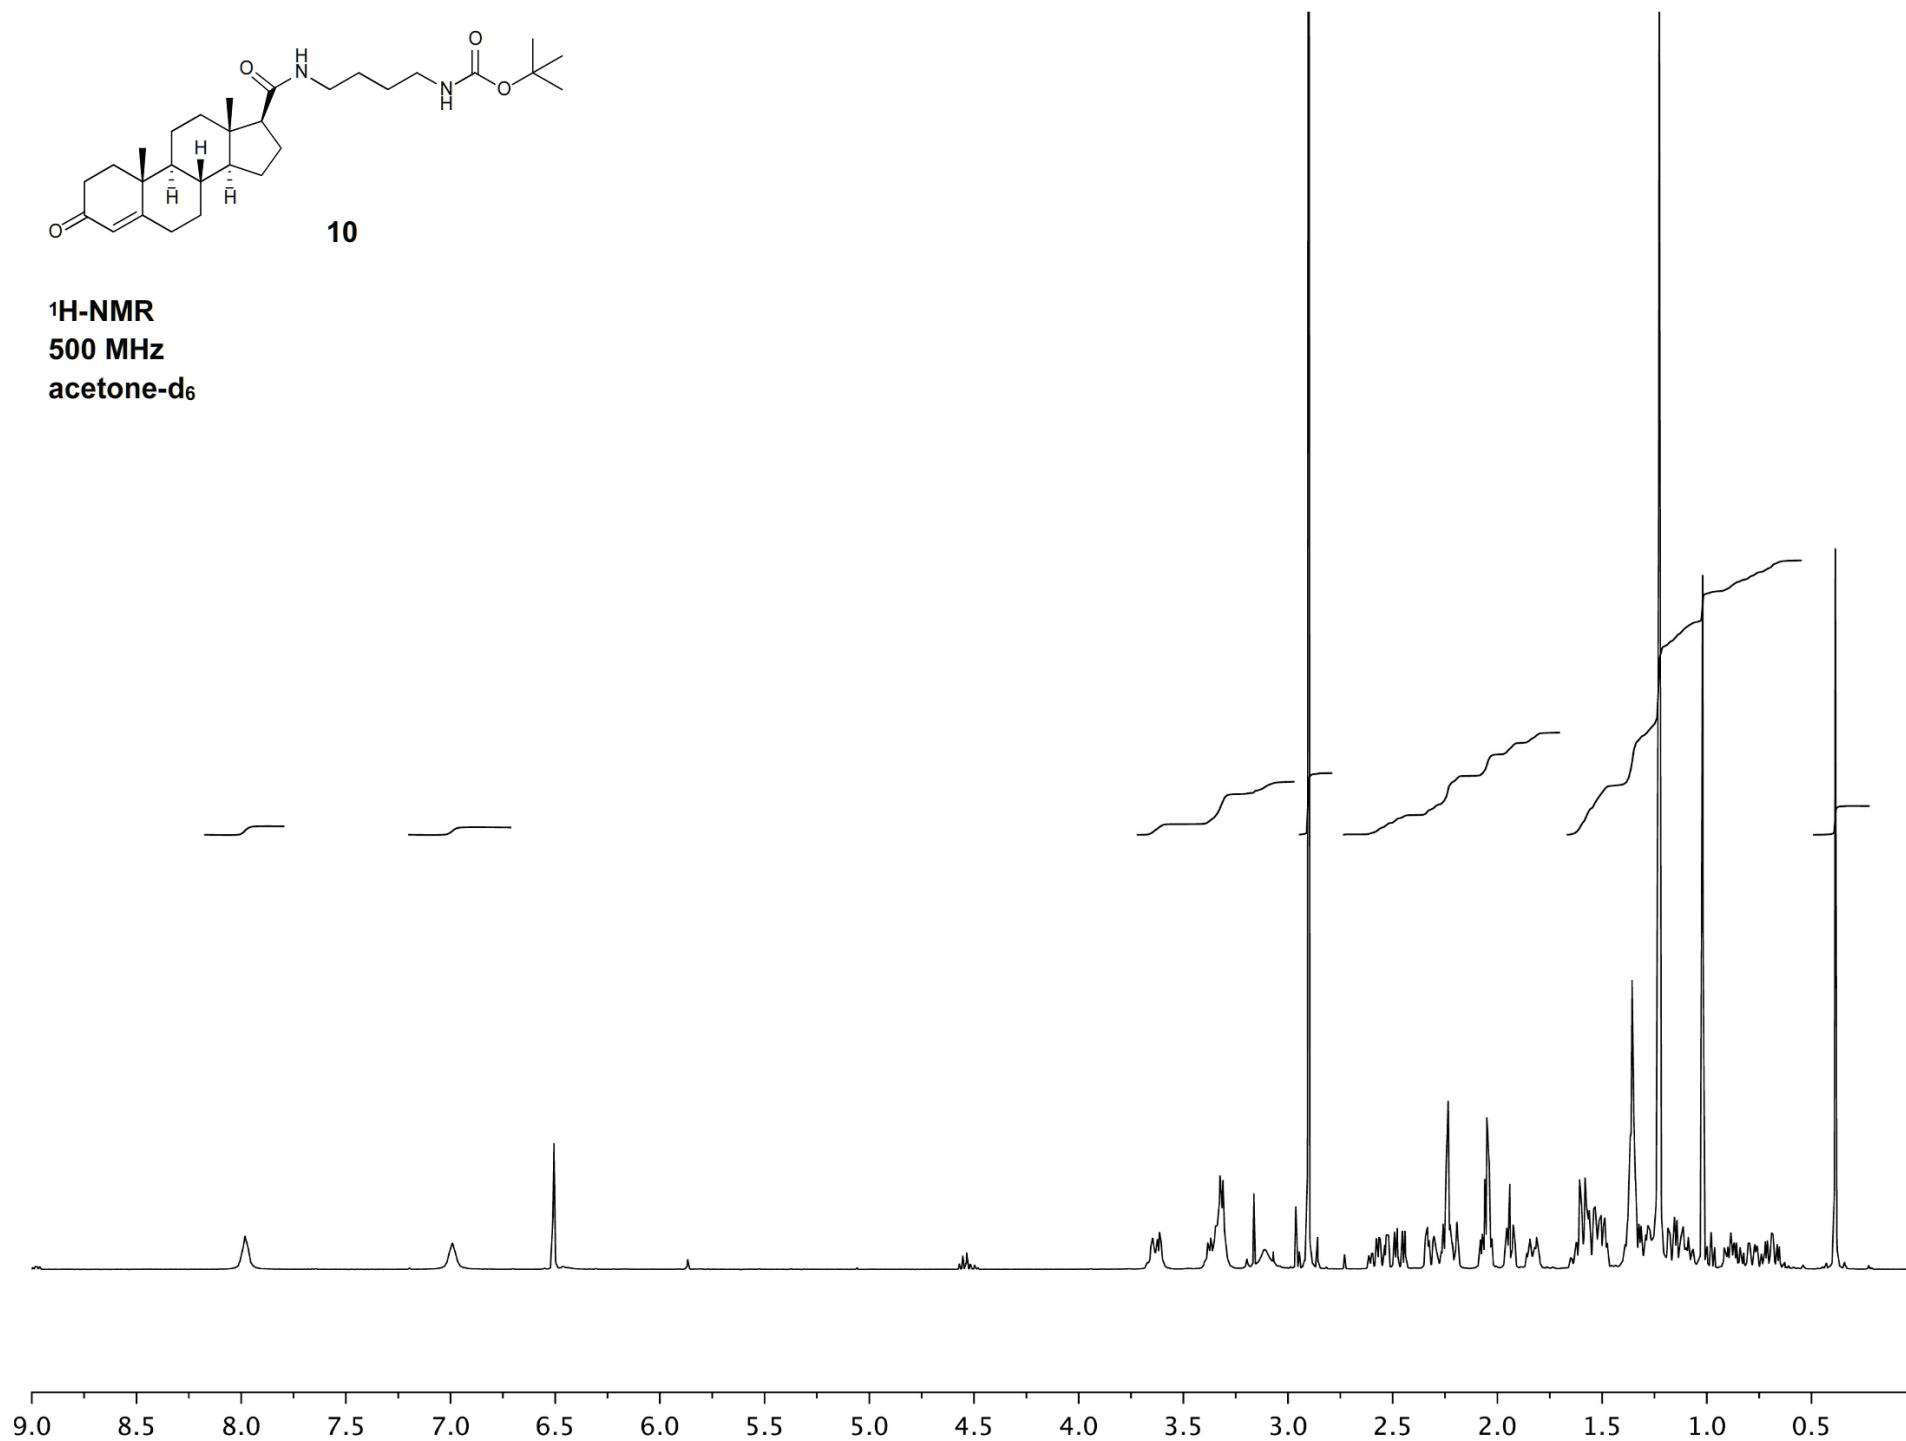

Figure S7h

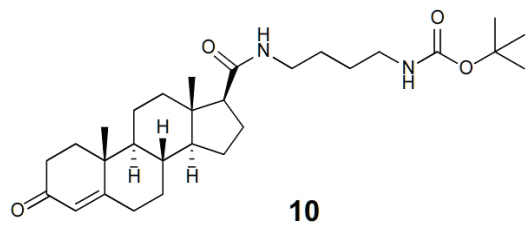

<sup>13</sup>C-NMR  
125 MHz  
acetone-d<sub>6</sub>

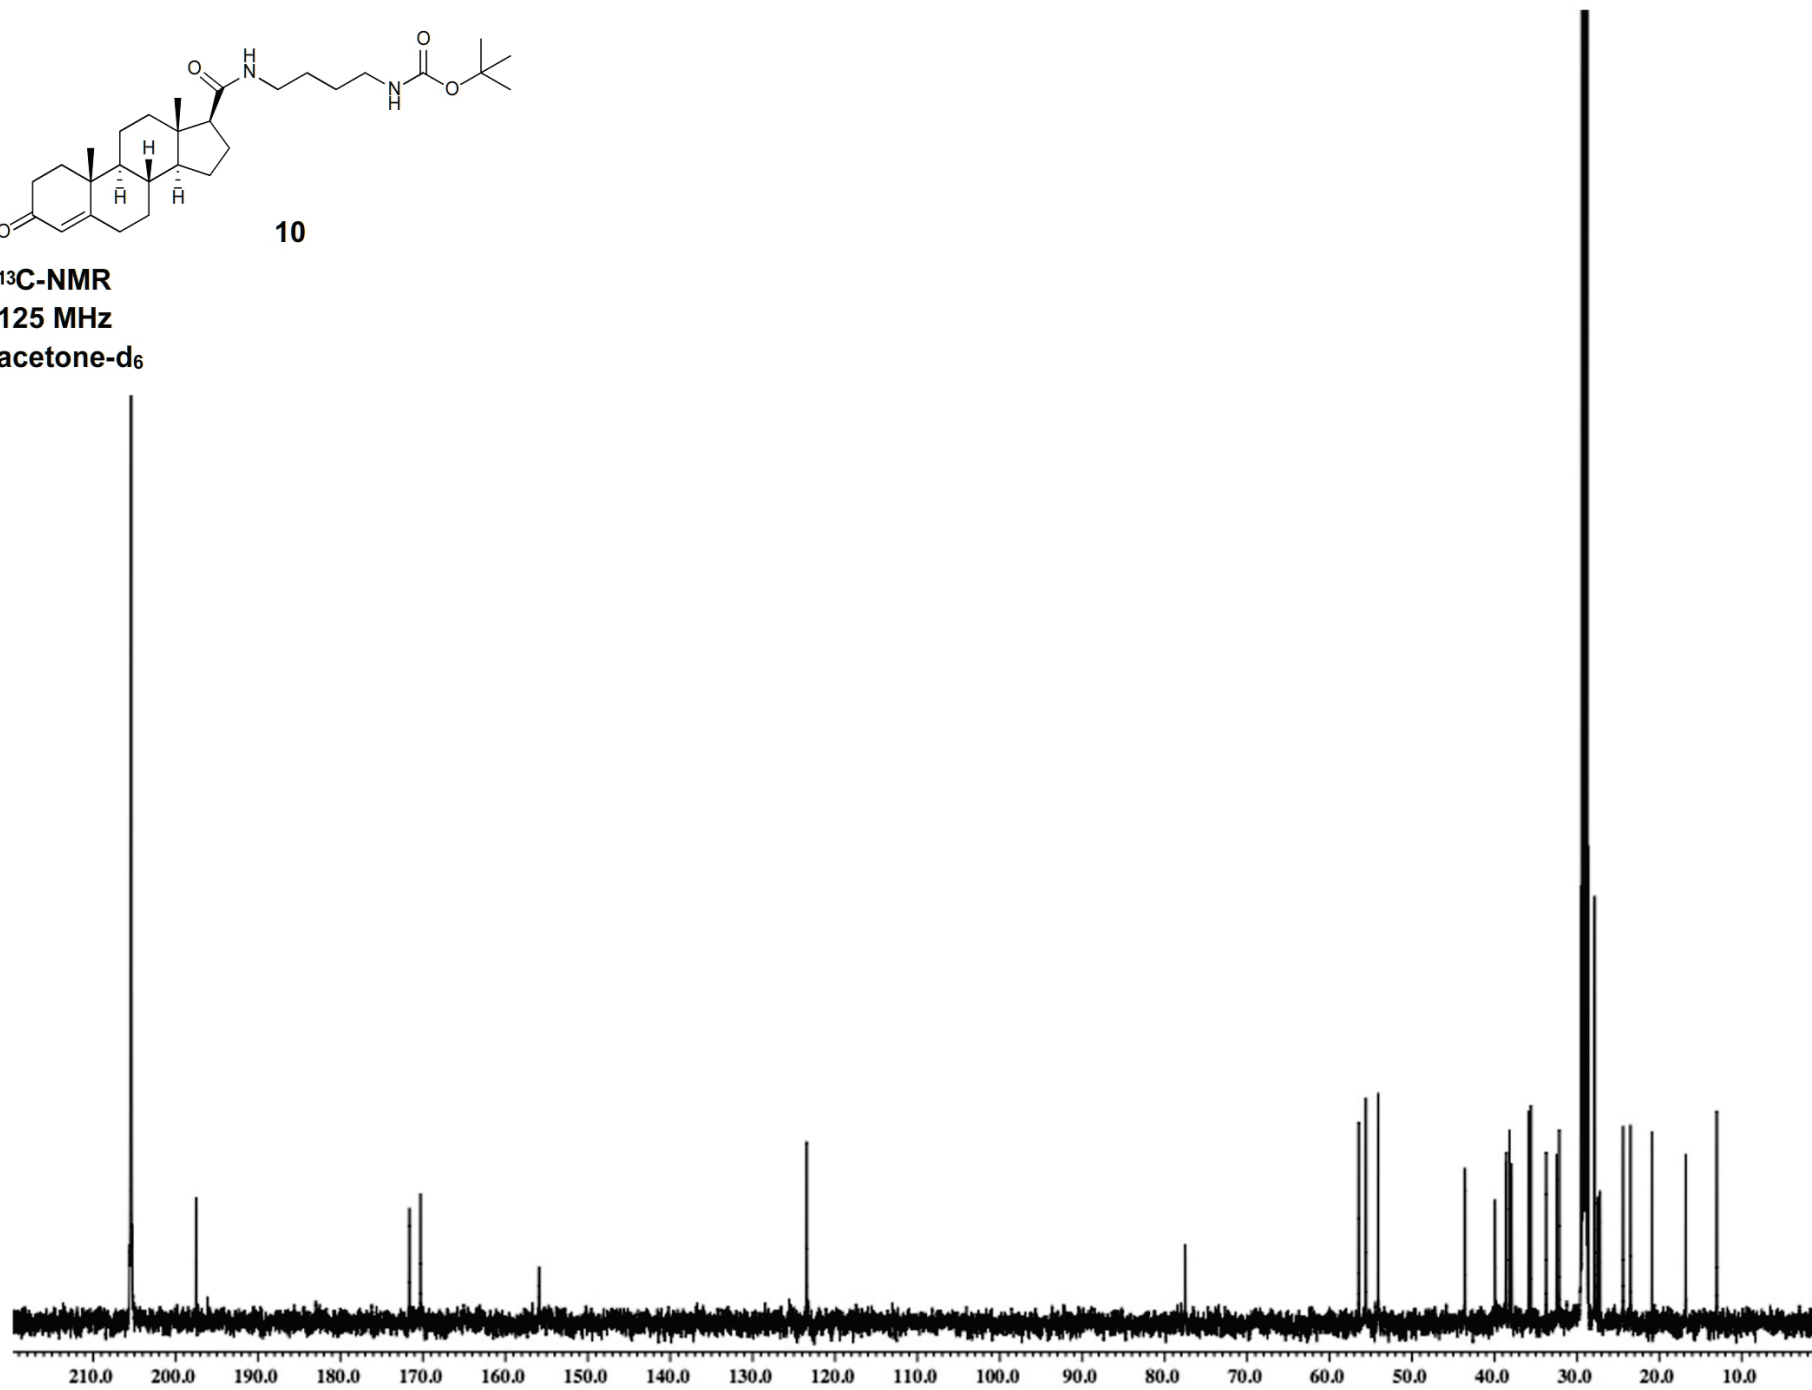

Figure S7i

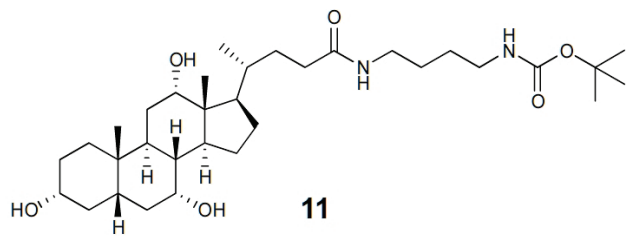

**<sup>1</sup>H-NMR**  
**500 MHz**  
**CDCl<sub>3</sub>**

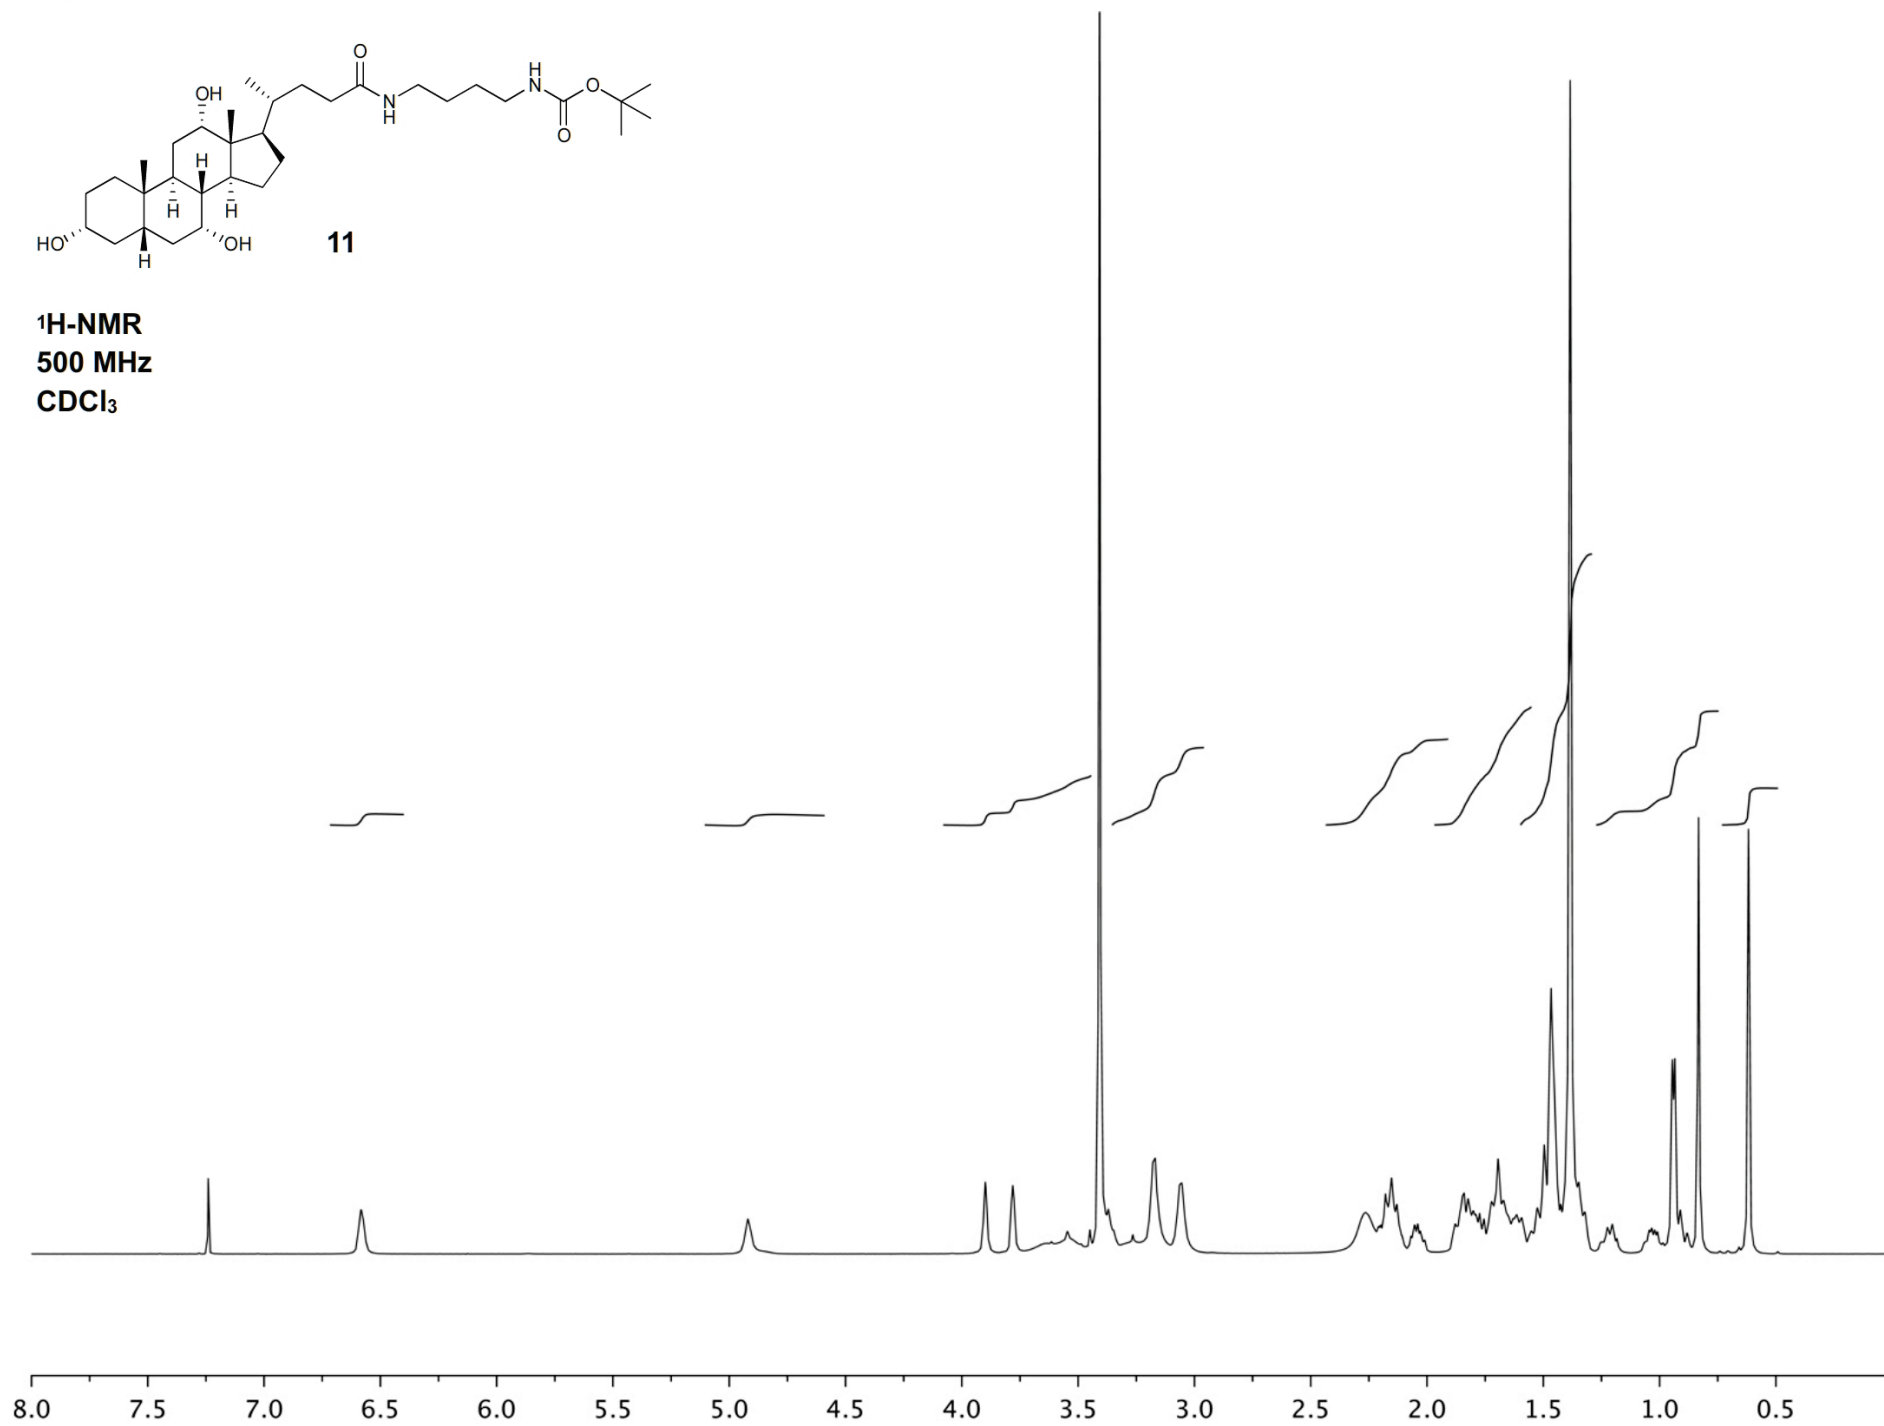

Figure S7j

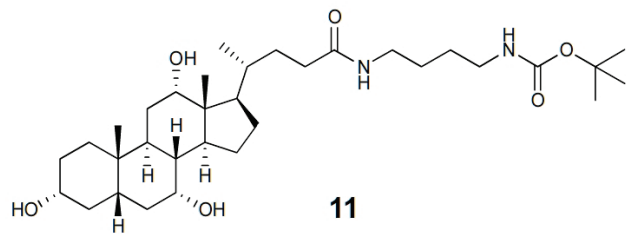

11

<sup>13</sup>C-NMR  
125 MHz  
CDCl<sub>3</sub>

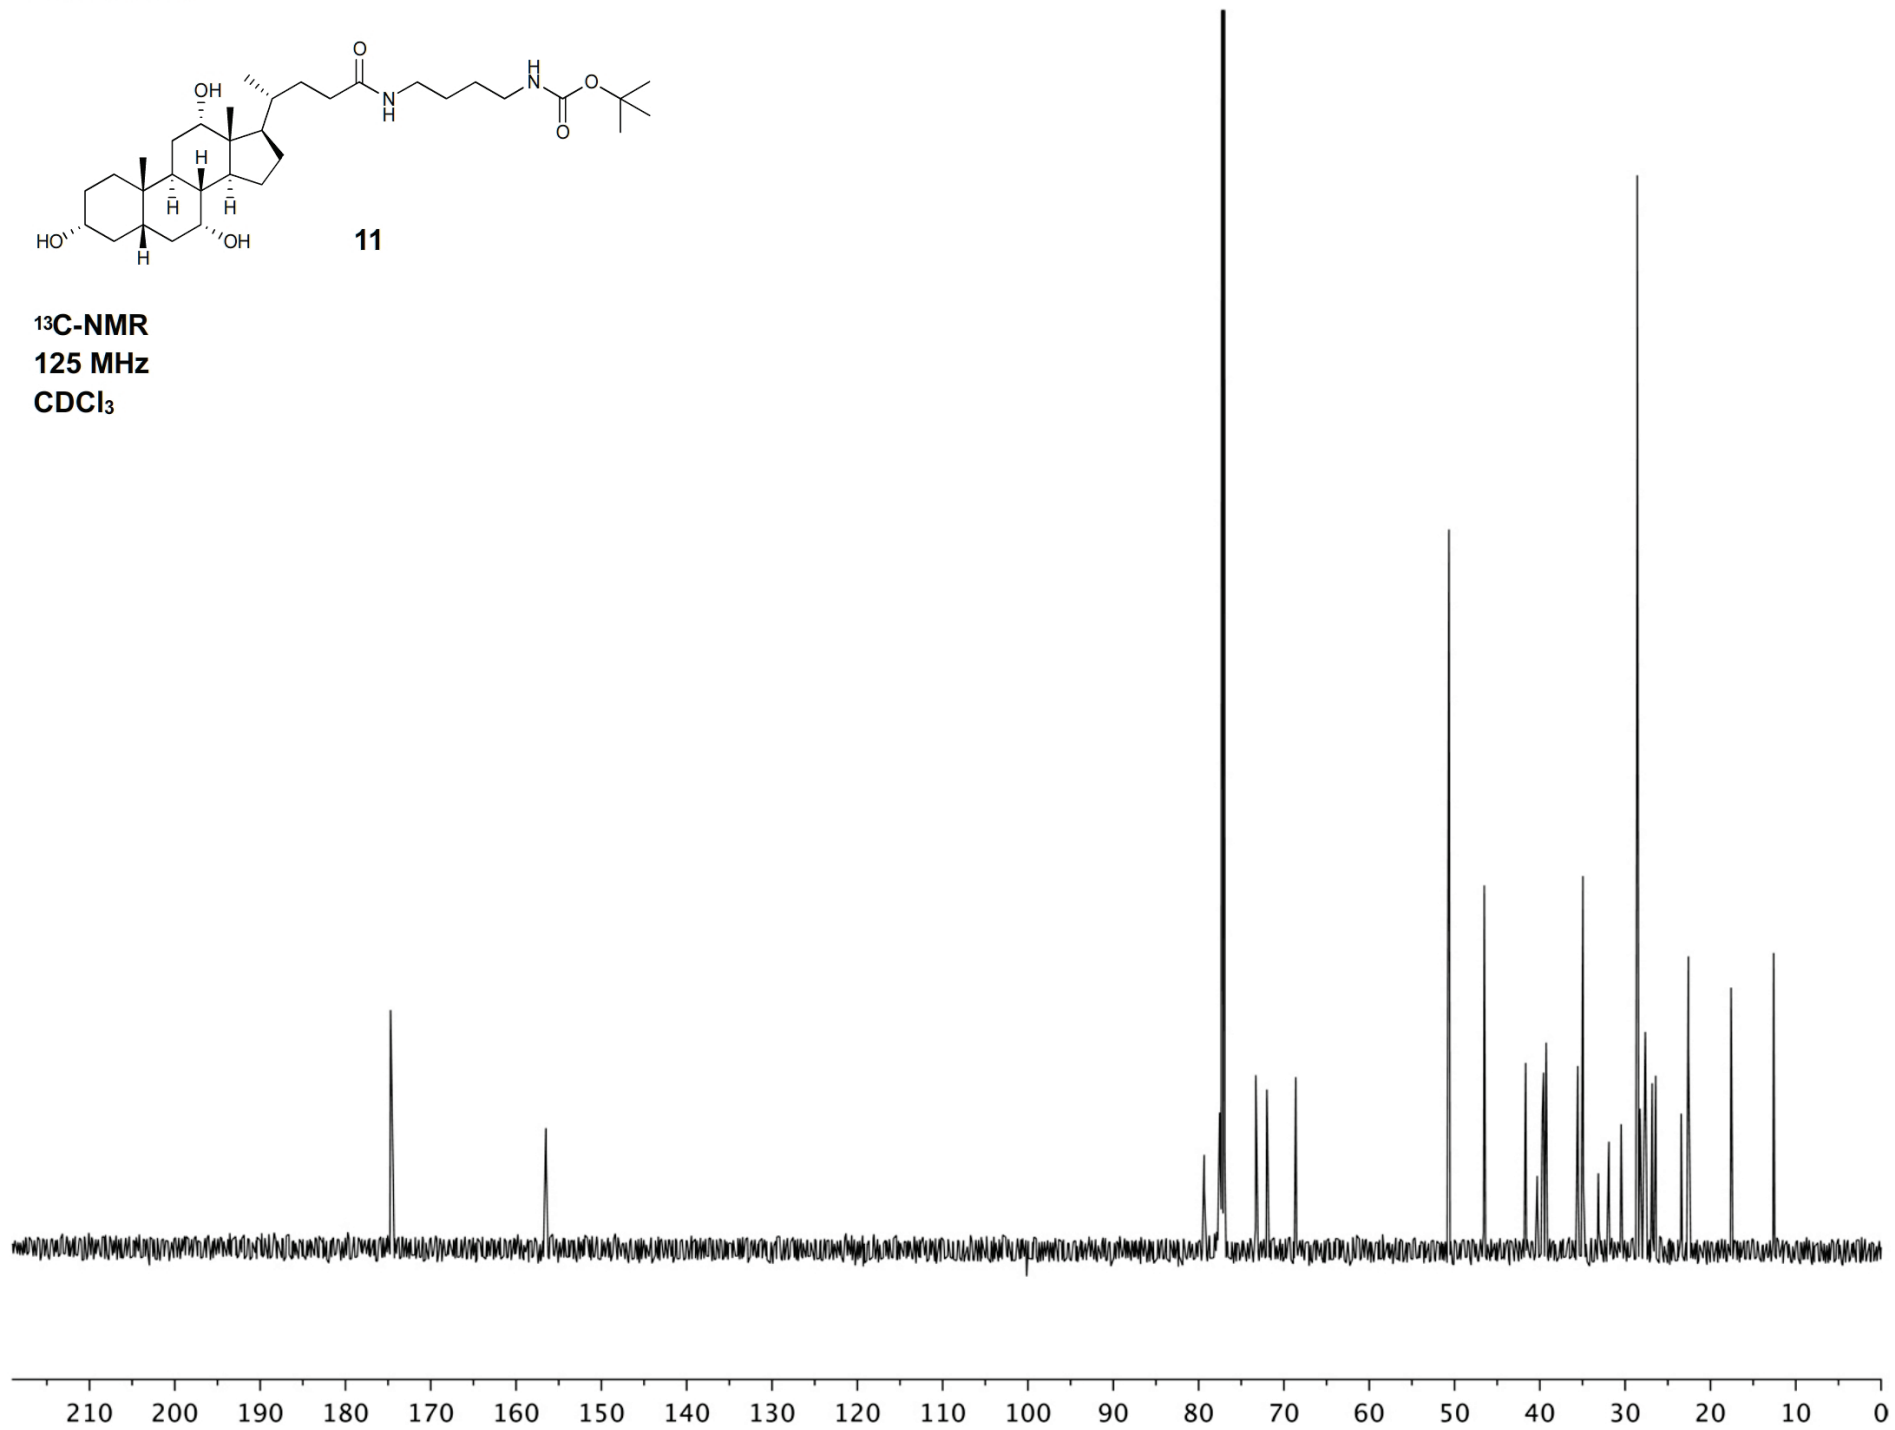

## II. Supporting Western Blot methods

### *Western blotting studies using reactive probe 4*

The method was first tested by screening for PR expression in a MCF-7 cell lysates. Whole MCF-7 cell lysate was prepared by homogenization in modified RIPA buffer (150 mM NaCl, 50 mM Tris-HCl, pH 7.4, 1% Triton X-100, 1 mM EDTA, 1 mM PMSF, 5 µg/ml aprotinin, 1 µg/ml pepstatin-A, 2 µg/ml ILeupeptin, 1 mM Na<sub>3</sub>VO<sub>4</sub>, 1 mM NaF). The debris was removed by centrifugation and the protein concentration was concentrated to 1 mg/mL using a 3 kDa cutoff filter. An aliquot of this lysate (500 µL) was treated with 20 µL of a 1 mg/mL stock of **4** in DMSO at 4 °C. A 50 µL sample was taken at 4 h and boiled for 5 min in SDS sample buffer (50 mM Tris-HCl pH 6.8, 12.5% glycerol, 1% SDS, 0.01% bromophenol blue containing 5% β-mercaptoethanol). SDS-PAGE gel analysis was conducted on a Novex X-cell station using NuPage 4-12% Bis-Tris gels and MOPS SDS running buffer. Western blotting was conducted by transfer to Hybond-P PVDF membrane by GE Healthcare (Piscataway, NJ) followed by blocking for 2 h with a solution of 0.1% Tween-20 with 5% w/v nonfat dry milk 20 in tris-buffered saline (TBS, pH 7.6). One lane (lane L5, **Fig. 3c**) was stained with a mouse anti-progesterone receptor 00005241-M01 Anti-PGR (1-110) mAb (anti-PR) from Abnova (Ann Arbor, MI), in 0.1% Tween-20 with 5% BSA in TBS, and a Goat anti-mouse IgG HRP mAb conjugate from Promega (Madison, WI) in 0.1% Tween-20 with 5% BSA in TBS. A second lane (lane L6, **Fig. 3c**) was stained a mouse anti-progesterone IgG mAb (anti-P) from Assay Designs (Tapei City, Taiwan), in 0.1% Tween-20 with 5% BSA in TBS, and a Goat anti-mouse IgG HRP mAb conjugate from Promega (Madison, WI) in 0.1% Tween-20 with 5% BSA in TBS. For both experiments, the primary and secondary antibodies were applied at 1:100 and 1:2,000 dilution, respectively, from their manufactures preparation. The total protein content in each gel was determined by staining with ponceau S from Promega (Madison, WI).



### III. Synthetic procedures and compound characterization.

Copies of  $^1\text{H}$  and  $^{13}\text{C}$  NMR spectra on each compound are provided in Figure S7.

***tert*-butyl 4-((8*S*,9*S*,10*R*,13*S*,14*S*,17*S*)-10,13-dimethyl-3-oxo-2,3,6,7,8,9,10,11,12,13,14,15, 16,17-tetradecahydro-1*H*-cyclopenta[ $\alpha$ ]phenanthrene-17-carboxamido)butylcarbamate (10).** HATU (157 mg, 0.41 mmol) was added to a mixture of 3-keto-4-etiocholenic acid **9** (65 mg, 0.021 mmol), *N*-*boc*-1,4-butyldiamine (53.5 mg, 0.28 mmol), and  $\text{EtN}^i\text{Pr}_2$  (108  $\mu\text{L}$ , 0.62 mmol) in anhydrous DMF (5 mL). The reaction was allowed to stir for 12 h at rt and then dried under vacuum. Any remaining HATU was precipitated with  $\text{CH}_2\text{Cl}_2$  and removed via filtration. Compound **10** (94 mg) was obtained as a colorless oil, 89% yield.  $^1\text{H}$  NMR ( $\text{CDCl}_3$ , 500 MHz)  $\delta$ : 7.98 (bs, 1H); 6.99 (bs, 1H); 6.51 (s, 1H); 3.63 (m, 1H); 3.35 (m, 3H); 2.90 (s, 6H); 2.66-2.41 (m, 2H); 2.36-2.22 (m, 1H); 2.27-2.16 (m, 3H); 2.11-2.01 (m, 2H); 2.00-1.88 (m, 1H); 1.87-1.73 (m, 1H); 1.67-1.42 (m, 6H); 1.41-1.25 (m, 5H); 1.23 (s, 3H); 1.19-1.05 (m, 3H); 1.02 (s, 3H); 0.94-0.58 (m, 4H); 0.39 (s, 3H).  $^{13}\text{C}$  NMR ( $\text{CDCl}_3$ , 100 MHz)  $\delta$ : 197.5; 171.7; 170.3; 155.9; 123.5; 77.5; 56.4; 55.6; 54.1; 43.6; 39.9; 38.6; 38.5; 38.2; 37.9; 35.8; 35.6; 33.7; 32.5; 32.1; 27.9; 27.5; 27.2; 24.4; 23.5; 20.8; 16.8; 13.0. HR-ESI-MS ( $m/z$ ): Calcd for  $\text{C}_{31}\text{H}_{51}\text{N}_2\text{O}_4$  [ $\text{M} + \text{H}$ ], 515.3771; Found 515.3784.

**(*R*)-*N*-(4-(2-(7-(dimethylamino)-2-oxo-2*H*-chromen-4-yl)acetamido)butyl)-4-((3*R*,5*S*,7*R*,8*R*,9*S*,10*S*,12*S*,13*R*,14*S*,17*R*)-3,7,12-trihydroxy-10,13-dimethylhexadecahydro-1*H*-cyclopenta[ $\alpha$ ]phenanthren-17-yl)pentanamide (2).** Intermediate **10** (54 mg, 0.10 mmol) was dissolved in  $\text{CH}_2\text{Cl}_2$  (1 mL). Trifluoroacetic acid (0.020 mL, 0.285 mmol) was added dropwise and the reaction was allowed to stir at room temperature for 1 h. The reaction was then diluted with  $\text{CH}_2\text{Cl}_2$  (10 mL) and washed with 0.001 N NaOH (1 mL) and water. The organic layer was concentrated *in vacuo*, and crude amine was used without further purification. HATU (80 mg, 0.20 mmol) was added to a solution of the crude amine, 7-dimethylamino-4-coumarinacetic acid (31 mg, 0.13 mmol), and  $\text{EtN}^i\text{Pr}_2$  (55  $\mu\text{L}$ , 0.31 mmol) in anhydrous DMF (1.5 mL). The reaction was allowed to stir for 16 h and then dried. Remaining HATU was precipitated with MeOH and removed via filtration. The crude product was subjected to flash chromatography (2:1 hexanes/EtOAc to 1:5 MeOH/EtOAc) with **2**, eluting with 1:10 MeOH/EtOAc, collected as a yellow wax (45 mg, 67% yield).  $^1\text{H}$  NMR (acetone- $d_6$ , 500 MHz)  $\delta$ : 9.44 (s, 2H); 8.99 (d, 1H,  $J = 11.3\text{Hz}$ ); 8.94 (bm, 1H); 8.00 (bm, 1H); 7.91 (dd, 1H,  $J = 3.2, 11.2\text{Hz}$ ); 7.72 (d, 1H,  $J = 3.2\text{Hz}$ ); 7.01 (s, 1H); 6.50 (s, 1H); 4.35 (m, 2H); 4.21 (dt, 1H,  $J = 8.0, 8.0, 16.1\text{Hz}$ ); 4.06 (s, 2H); 3.70 (m, 2H); 3.59 (m, 1H); 3.51 (m, 2H); 3.39 (m, 1H); 3.34 (s, 2H); 2.90 (s, 6H); 2.61-2.42 (m, 3H); 2.33 (ddd, 1H,  $J = 3.0, 5.0, 18.1\text{Hz}$ ); 2.26-2.17 (m, 2H); 2.09-1.97 (m, 1H); 1.95-1.78 (m, 3H); 1.62-1.42 (m, 4H); 1.41-1.22 (m, 2H); 1.28 (s, 3H); 1.27 (s, 3H); 1.24 (d, 3H,  $J = 9.1\text{Hz}$ ); 1.17-1.04 (m, 4H); 1.01 (s, 3H); 0.90-0.63 (m, 4H); 0.35 (s, 3H). HR-ESI-MS ( $m/z$ ): Calcd for  $\text{C}_{37}\text{H}_{50}\text{N}_3\text{O}_5$  [ $\text{M} + \text{H}$ ], 616.3672; Found 616.3618.

***t*-butyl 4-((*R*)-4-((3*R*,5*S*,7*R*,8*R*,9*S*,10*S*,12*S*,13*R*,14*S*,17*R*)-3,7,12-trihydroxy-10,13-dimethylhexadecahydro-1*H*-cyclopenta[ $\alpha$ ]phenanthren-17-yl)pentanamido)butylcarbamate (11).** HATU (175 mg, 0.46 mmol) was added to a solution of cholic acid (100 mg, 0.24 mmol), *N*-*boc*-1,4-butanediamine (95 mL, 0.49 mmol), and  $\text{Et}_3\text{N}$  (0.15 mL, 1.1 mmol) in anhydrous DMF (1.5 mL). The reaction was allowed to stir for 16 h, then diluted with deionized  $\text{H}_2\text{O}$  (20 mL) and extracted with

EtOAc (20 mL). The organics were washed three times with deionized H<sub>2</sub>O (15 mL), dried over MgSO<sub>4</sub>, and concentrated *in vacuo*. Any remaining HATU was precipitated with CH<sub>2</sub>Cl<sub>2</sub> and removed via filtration. Compound **11** (114 mg) was obtained as a clear oil, 80% yield. <sup>1</sup>H NMR (CDCl<sub>3</sub>, 500 MHz) δ: 6.58 (br s, 1H); 4.92 (br s, 1H); 3.90 (s, 1H); 3.78 (s, 1H); 3.41 (s, 9H); 3.17 (br d, 2H, *J* = 5.4 Hz); 3.06 (br d, 2H, *J* = 4.6 Hz); 2.27 (br s, 2H); 2.15 (t, 2H, *J* = 13.2 Hz); 1.14 (m, 1H); 1.88-1.75 (m, 2H); 1.70 (t, 3H, *J* = 13.7 Hz); 1.65-1.49 (m, 2H); 1.47 (br s, 6H); 1.38 (s, 12H); 1.2 (m, 1H); 1.02 (m, 1H); 0.94 (d, 3H, *J* = 5.5 Hz); 0.83 (s, 3H); 0.62 (s, 3H). <sup>13</sup>C NMR (CDCl<sub>3</sub>, 125 MHz) δ: 174.5; 156.3; 79.1; 73.1; 71.8; 68.4; 50.4; 46.3; 41.5; 41.3; 40.1; 39.5; 39.3; 39.0; 35.3; 35.2; 34.7; 34.6; 32.9; 31.7; 30.2; 28.3 (3C); 28.0; 27.5; 27.4; 26.6; 26.2; 23.2; 22.3; 17.4; 12.4. HR-ESI-MS (*m/z*): Calcd for C<sub>33</sub>H<sub>58</sub>N<sub>2</sub>O<sub>6</sub>Na [M + Na], 601.4192; Found 601.4176.

**(R)-N-(4-(2-(7-(dimethylamino)-2-oxo-2H-chromen-4-yl)acetamido)butyl)-4-((3R,5S,7R,8R,9S,10S,12S,13R,14S,17R)-3,7,12-trihydroxy-10,13-dimethylhexadecahydro-1H-cyclopenta-[α]-phenanthren-17-yl)pentanamide (3).** Intermediate **11** (55 mg, 0.095 mmol) was dissolved in CH<sub>2</sub>Cl<sub>2</sub> (1 mL). Trifluoroacetic acid (0.020 mL, 0.285 mmol) was added dropwise and the reaction was allowed to stir at room temperature for 1 h. The reaction was then diluted with CH<sub>2</sub>Cl<sub>2</sub> (10 mL) and washed with deionized H<sub>2</sub>O (10 mL). The organic layer was concentrated *in vacuo*, and crude amine was used without further purification. HATU (63 mg, 0.167 mmol) was added to a solution of the crude amine, 7-dimethylamino-4-coumarinacetic acid (21 mg, 0.084 mmol), and Et<sub>3</sub>N (0.035 mL, 0.25 mmol) in anhydrous DMF (1.5 mL). The reaction was allowed to stir for 16 h, then diluted with deionized H<sub>2</sub>O (25 mL) and extracted with EtOAc (25 mL). The organics were washed 3× with deionized H<sub>2</sub>O (20 mL), dried over MgSO<sub>4</sub>, and concentrated *in vacuo*. Remaining HATU was precipitated with MeOH and removed via filtration. The organics were subjected to reversed-phase HPLC, and **2**, eluting with 58% aqueous acetonitrile, was collected as a yellow powder (35 mg, 52% yield). <sup>1</sup>H NMR (CDCl<sub>3</sub>, 500 MHz) δ: 7.49 (d, 1H, *J* = 9.0 Hz); 7.00 (t, 1H, *J* = 5.2 Hz); 6.57 (dd, 1H, *J* = 9.0, 2.4 Hz); 6.45 (t, 1H, *J* = 5.2 Hz); 6.39 (d, 1H, *J* = 2.4 Hz); 6.05 (s, 1H); 3.92 (br m, 1H); 3.8 (br s, 1H); 3.61 (s, 2H); 3.46 (d, 1H, *J* = 5.5 Hz); 3.40 (br m, 1H); 3.25-3.10 (m, 4H); 3.00 (s, 6H); 2.65 (s, 1H); 2.18 (t, 2H, *J* = 11.7 Hz); 2.10-1.95 (m, 4H); 1.79 (m, 2H); 1.82-1.53 (m, 8H); 1.48 (br m, 9H); 1.36 (m, 2H); 1.21 (m, 1H); 1.07 (m, 1H); 0.96 (d, 3H, *J* = 5.8 Hz); 0.85 (s, 3H); 0.63 (s, 3H). <sup>13</sup>C NMR (CDCl<sub>3</sub>, 125 MHz) δ: 174.5; 168.5; 162.3; 155.9; 153.0; 150.7; 125.9; 109.9; 109.2; 108.6; 98.0; 73.0; 71.9; 68.4; 46.4; 46.2; 41.8; 41.5; 40.3; 40.1 (3C); 39.7; 39.6; 39.5; 38.9; 35.3; 34.7 (2C); 32.7; 31.7; 30.5; 28.2; 27.6; 27.0; 26.4; 26.3; 23.2; 22.5; 17.5; 12.5. HR-ESI-MS (*m/z*): Calcd for C<sub>41</sub>H<sub>62</sub>N<sub>3</sub>O<sub>7</sub> [M + H], 708.4582; Found 708.4583.

**(R)-N-(4-(2-(7-(dimethylamino)-2-oxo-2H-chromen-4-yl)acetamido)butyl)-4-((3R,5S,7R,8R,9S,10S,12S,13R,14S,17R)-3,7,12-trihydroxy-10,13-dimethylhexadecahydro-1H-cyclopenta-[α]-phenanthren-17-yl)pentanamide (4).** HATU (157 mg, 0.41 mmol) was added to a mixture of 3-keto-4-etiocholenic acid **9** (65 mg, 0.021 mmol), and EtN<sup>i</sup>Pr<sub>2</sub> (108 μL, 0.62 mmol) in anhydrous DMF (5 mL). The reaction was allowed to stir for 12 h at rt and then dried under vacuum. Compound **4** (84 mg) was obtained as a clear wax, 94% yield after flash chromatography (2:1 hexanes/EtOAc to 1:10 MeOH/EtOAc). <sup>1</sup>H-NMR (CDCl<sub>3</sub>, 500 MHz) δ: 8.70 (d, 1H, *J* = 4.5 Hz); 8.40 (d, 1H, *J* = 8.4 Hz); 7.48 (dd, 1H, *J* = 4.5, 8.4 Hz); 5.73 (s, 1H); 4.09 (dd, 1H, *J* = 7.1, 7.1 Hz); 2.89 (t, 1H, *J* = 9.3 Hz); 2.49-2.16

(m, 6H); 2.14-2.03 (m, 2H); 1.95-1.77 (m, 5H); 1.76-1.37 (m, 2H); 1.35-1.22 (m, 1H); 1.21 (s, 3H); 1.18-1.00 (m, 2H); 1.00 (s, 3H).  $^{13}\text{C}$ -NMR ( $\text{CDCl}_3$ , 125 MHz)  $\delta$ : 199.7; 170.8; 170.2; 151.8; 140.8; 135.2; 129.7; 124.3; 121; 60.6; 55.8; 53.8; 52.9; 45.6; 38.8; 38; 36.1; 36; 34.2; 32.9; 32.1; 24.8; 24.2; 21.3; 17.6; 14.4; 13.8. HR-ESI-MS ( $m/z$ ): Calcd for  $\text{C}_{25}\text{H}_{31}\text{N}_4\text{O}_3$  [ $\text{M} + \text{H}$ ], 435.2318; Found 435.2389.
